# Supplementary material for: Phenol hydroxyl-modified imine-based covalent organic frameworks for enhanced solar-driven generation of H2O2via hydrogen bonds
Source: Royal Society of Chemistry journal article supplement (doi:10.1039/d4cy01096e), 2024-11-11
Supplement: d4cy01096e1.pdf [file d4cy01096e1.pdf]

## **Supporting information**

Phenol Hydroxyl-Modified Imine-Based Covalent organic framework for  
enhanced solar-driven generation of H<sub>2</sub>O<sub>2</sub> via Hydrogen Bonds

## Contents

|                                                                                                                                     |    |
|-------------------------------------------------------------------------------------------------------------------------------------|----|
| 1. Experimental protocols and instrument .....                                                                                      | 3  |
| 1.1. Characterizations methods .....                                                                                                | 3  |
| 1.2. Characterization.....                                                                                                          | 4  |
| 2. Photochemical properties .....                                                                                                   | 10 |
| 3. Photocatalytic performance .....                                                                                                 | 14 |
| 3.1. Dispersion of catalyst in mixture of BA/water.....                                                                             | 14 |
| 3.2. Stability of catalyst .....                                                                                                    | 15 |
| 3.3. Cycling, pH, and solar experiment.....                                                                                         | 20 |
| 4. Mechanism studies.....                                                                                                           | 21 |
| 4.1. Reduction reaction of O <sub>2</sub> .....                                                                                     | 21 |
| 4.2. Oxidation of BA .....                                                                                                          | 24 |
| 4.3. autocatalysis .....                                                                                                            | 27 |
| 4.4. intramolecular hydrogen bond: suppression both decomposition of H <sub>2</sub> O <sub>2</sub> and oxidation of catalysis ..... | 29 |
| 5. Comparison with other photocatalysts .....                                                                                       | 36 |
| 6. Computational part .....                                                                                                         | 37 |
| 7. REFERENCE.....                                                                                                                   | 62 |

## **1. Experimental protocols and instrument**

### **1.1.Characterizations methods**

The powder diffraction patterns were measured by DX-1000 system with Cu K $\alpha$  radiation source ( $\lambda = 1.540598 \text{ \AA}$ ) at a scan rate of  $5^\circ \text{ min}^{-1}$  in  $2\theta$  range from  $1.5^\circ$  to  $90^\circ$ . Nicolet 670 FT-IR spectrophotometer (thermos Nicolet, USA) was used for Fourier transform infrared spectroscopy analyses (FT-IR). Solid-state  $^{13}\text{C}$  cross polarization magic angle spinning NMR spectra ( $^{13}\text{C}$ -CP/MAS NMR) were carried out on Bruker AVANCE III 500 MHz (Bruker, Switzerland) with a standard 4 mm magic angle spinning (MAS) triple resonance probe (the MAS frequency was 10 kHz). X-ray photoelectron spectroscopy (XPS) was conducted on Axis Ultra DLD X-ray photoelectron spectrometer with a monochromatic Al radiation ( $h\nu = 15.00 \text{ kV}$ ) (Kratos Analytical, UK). The porous property and surface area were assessed by The ASAP 2460 Surface Area and Porosity Analyzer. The sample was degassed and evaporated under vacuum at  $100^\circ\text{C}$  for one day before  $\text{N}_2$  adsorption-desorption at 77 K. Diffuse reflectance ultraviolet-visible (UV-vis, UV3600, Shimadzu, Japan) spectra was performed to measure the light absorption. The morphology was measured by Field emission-scanning electron microscope (SEM, S-4800, Hitachi, Japan). electrochemical workstation was used to test Mott-Schottky measurements, photocurrent, and electrochemical impedance spectroscopy (EIS). The supporting electrolyte for MS measurement and photocurrent was 0.1 M  $\text{Na}_2\text{SO}_4$  aqueous solution while that for EIS was aqueous solution with 0.1 M KCl, 0.05 M Potassium ferricyanide, and 0.05 M Potassium ferrocyanide. Fluorescence spectroscopy was carried out on F-7100 (Hitachi, Japan).

## 1.2. Characterization

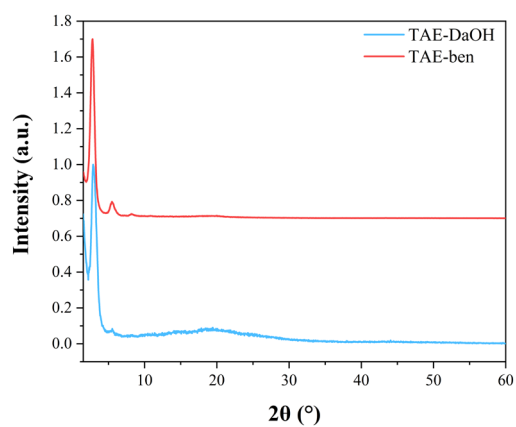

Figure S1. PXRD patterns of TAE-DaOH and TAE-ben.

Both TAE-DaOH and TAE-ben performed identical peak at  $2\theta$  of  $2.80^\circ$  corresponding to (100) facet, which were consistent with the simulated eclipsed staking model.



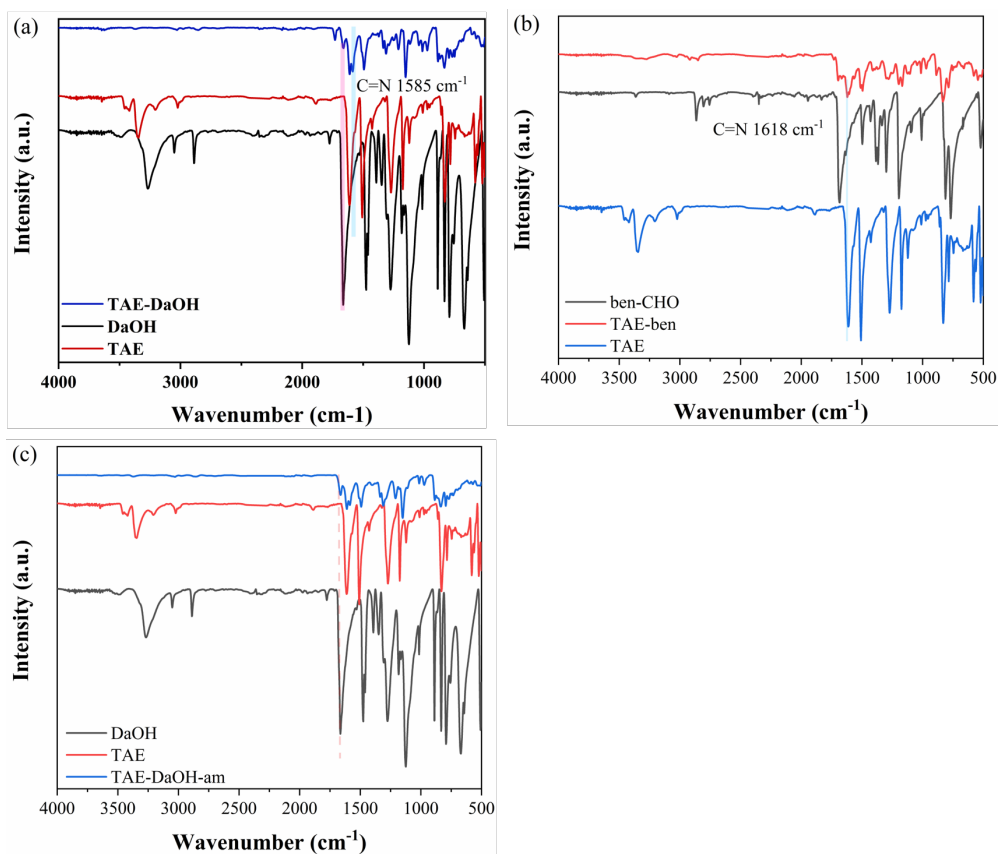

Figure S2. FT-IR of TAE-DaOH and TAE-ben.

As shown in figure S2a and c, the presence of characteristic peak of (C=N) at 1585 cm<sup>-1</sup> reveal the successful synthesis of TAE-DaOH. The stretching vibrational of C=N was observed at 1620 cm<sup>-1</sup>, indicating the existence of imine structure in TAE-ben. Furthermore, the absent of characteristic peaks of both NH<sub>2</sub> and C(H)=O suggested highly complete polymerization<sup>1</sup>. Compared with characteristic peak (C=N) of TAE-ben at 1620 cm<sup>-1</sup>, the characteristic peak of TAE-DaOH redshifted to 1580 cm<sup>-1</sup>, indicating intramolecular hydrogen bond between phenolic hydroxyl group and imine bond.

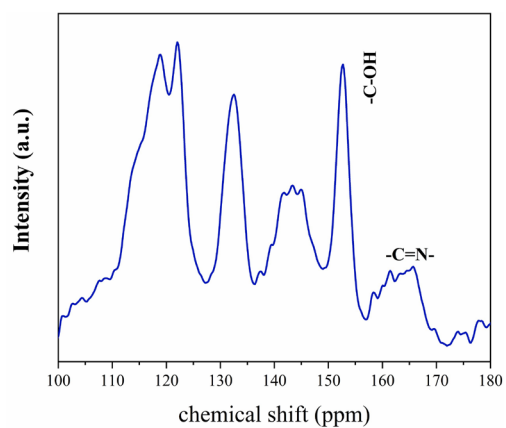

Figure S3.  $^{13}\text{C}$  CP-MAS NMR.

The structure of TAE-DaOH was further tested by  $^{13}\text{C}$  CP-MAS NMR as shown in figure S3, the present peak at 165 ppm was attributed to carbon of imine while the peak at 151 ppm corresponded to the carbon of phenol<sup>2</sup>.

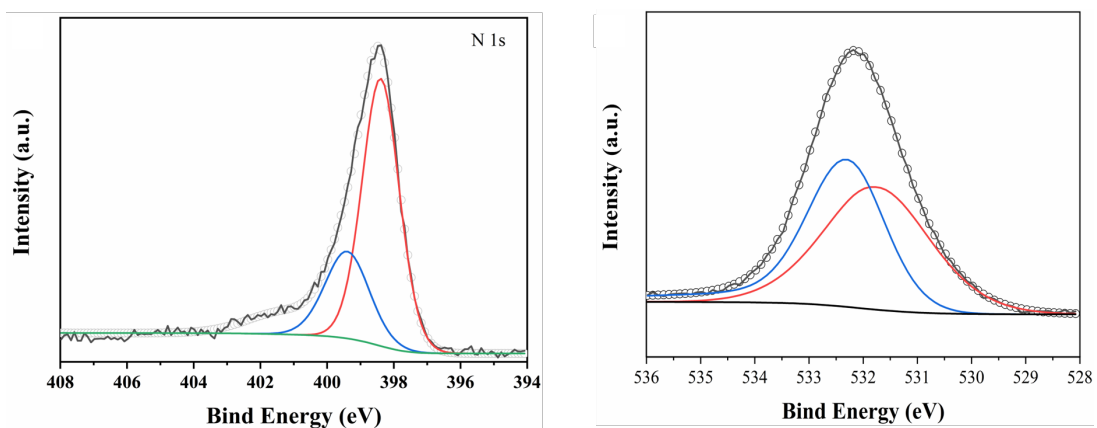

Figure S4. High resolution of XPS pattern, N 1s (left) and O 1s (right). The state of phenol in TAE-DaOH was further confirmed by XPS (figure S4), the present peak at 532.4 eV in high resolution spectra was assigned to O of phenol (the peak at 531.2 eV was attributed to O of H<sub>2</sub>O)<sup>3</sup>.

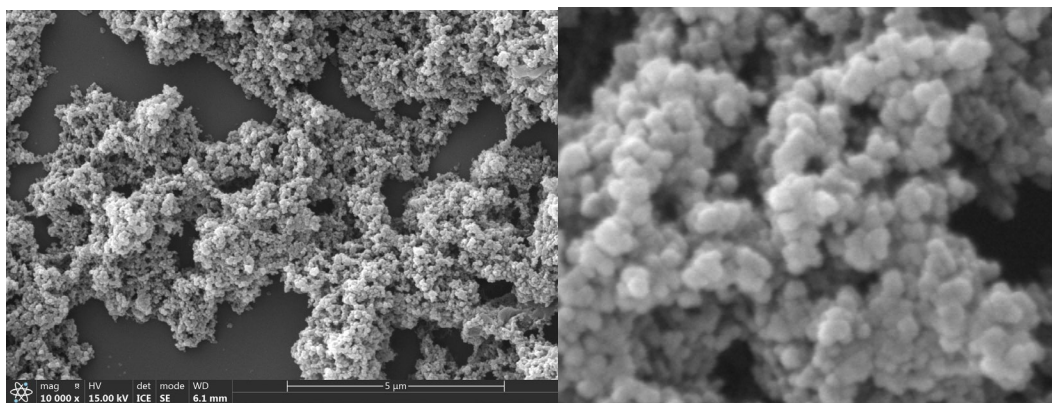

Figure S5. SEM of TAE-DaOH. Proportional scale: 5  $\mu\text{m}$  (left), 3  $\mu\text{m}$  (right).  
The prepared TAE-DaOH displayed irregular morphologies with sizes from 20 nm to 30 nm.

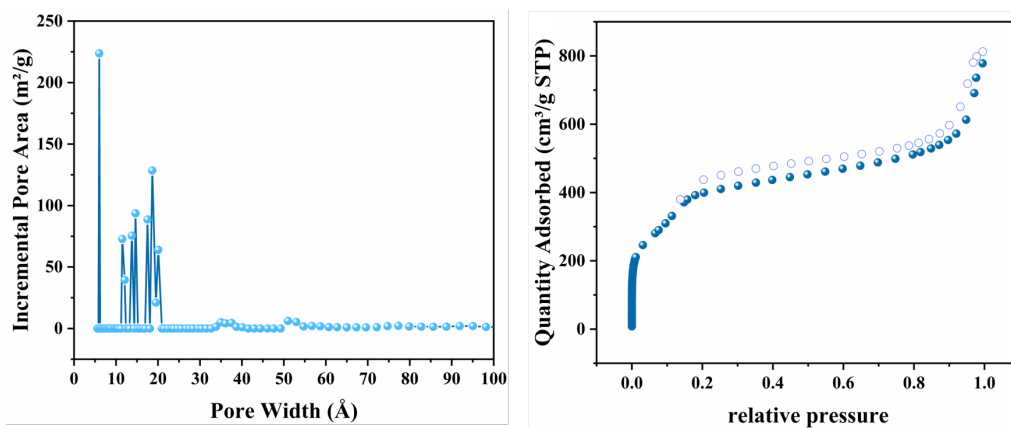

Figure S6. Pore distribution of TAE-DaOH.

According to BET analyze (figure S6), the surface of TAE-DaOH was calculated to be 1217.2 m<sup>2</sup> g<sup>-1</sup>, the large surface was beneficial for photocatalysis to provide a vast number of reactive sites. In addition, the pore size was evaluated to be 0.60 nm and 1.86 nm, which was fitted with the simulated eclipsed stacking model<sup>4</sup>.

## 2. Photochemical properties

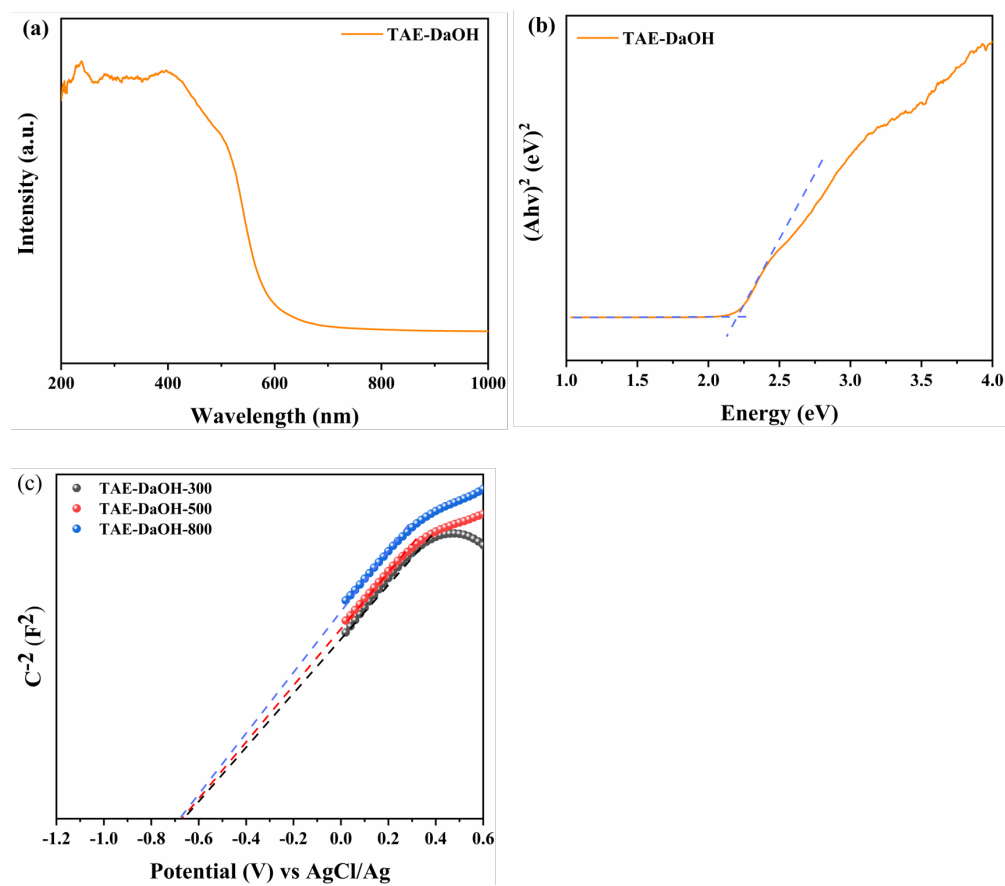

Figure S7. Photochemical properties of TAE-DaOH. (a) UV-vis diffuse reflection, (b) derived band, (c) MS curve.

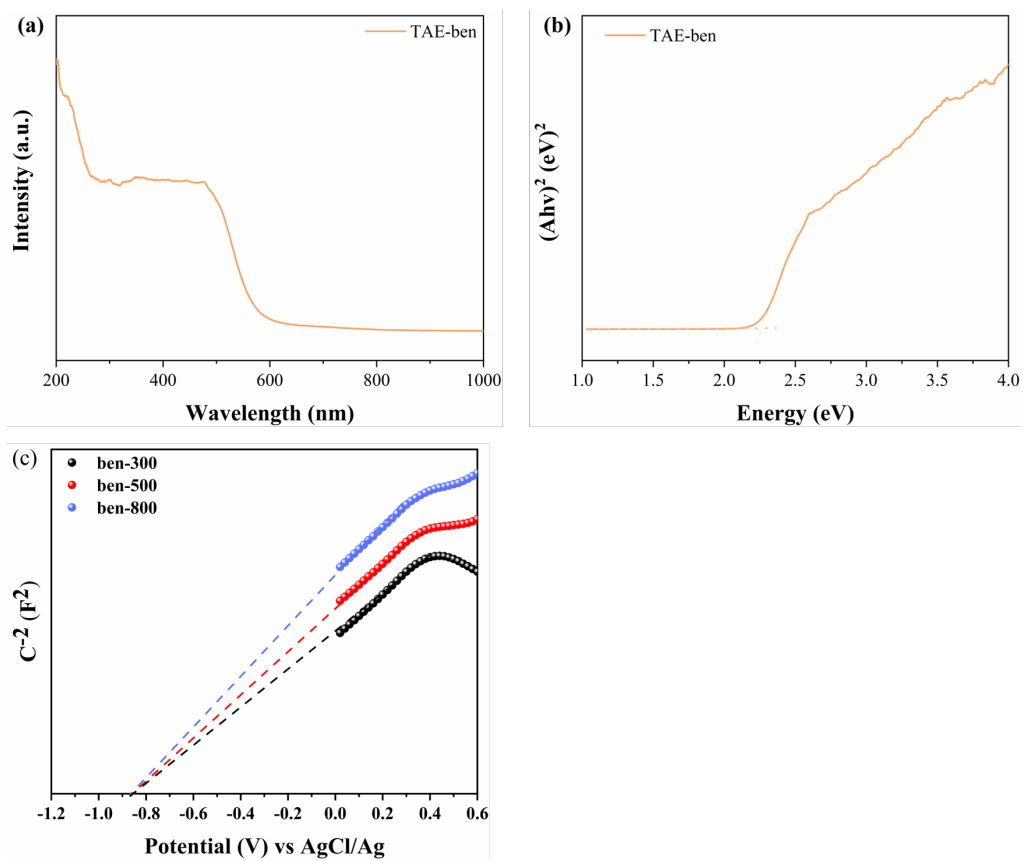

Figure S8. Photochemical properties of TAE-ben. (a) UV-vis diffuse reflection, (b) derived band, (c) MS curve.

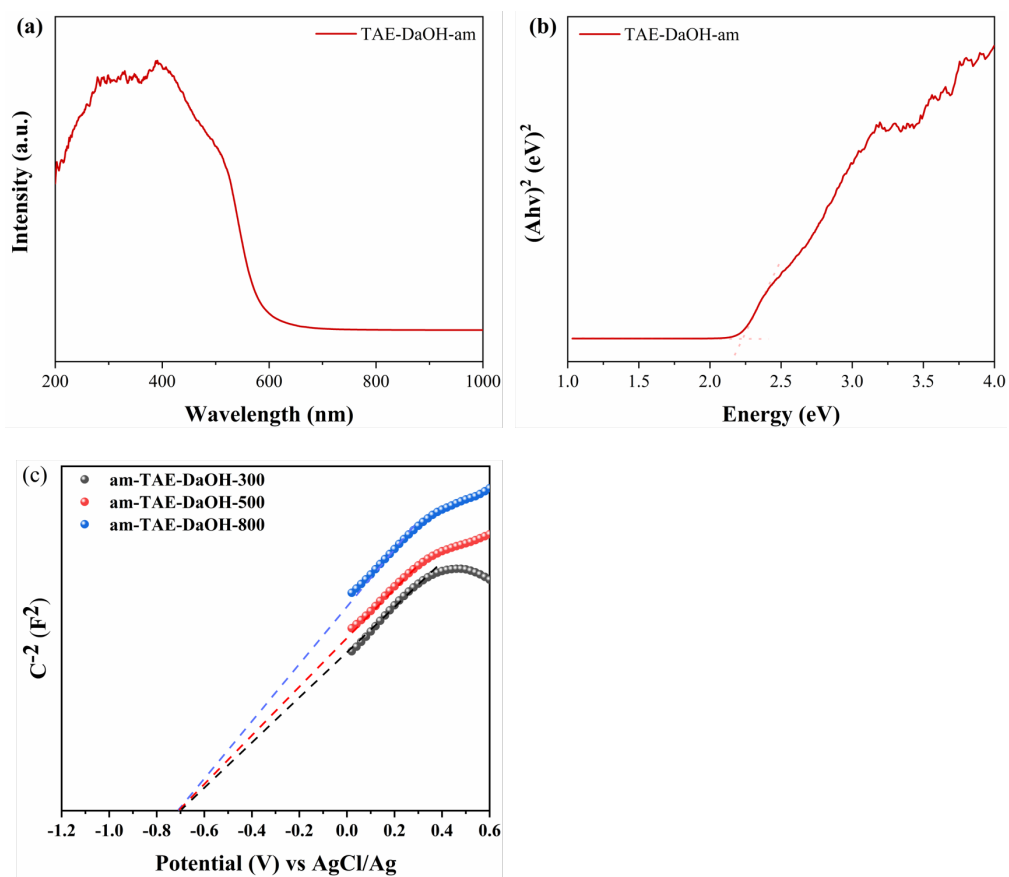

Figure S9. Photochemical properties of TAE-DaOH-am. (a) UV-vis diffuse reflection, (b) derived band, (c) MS curve.



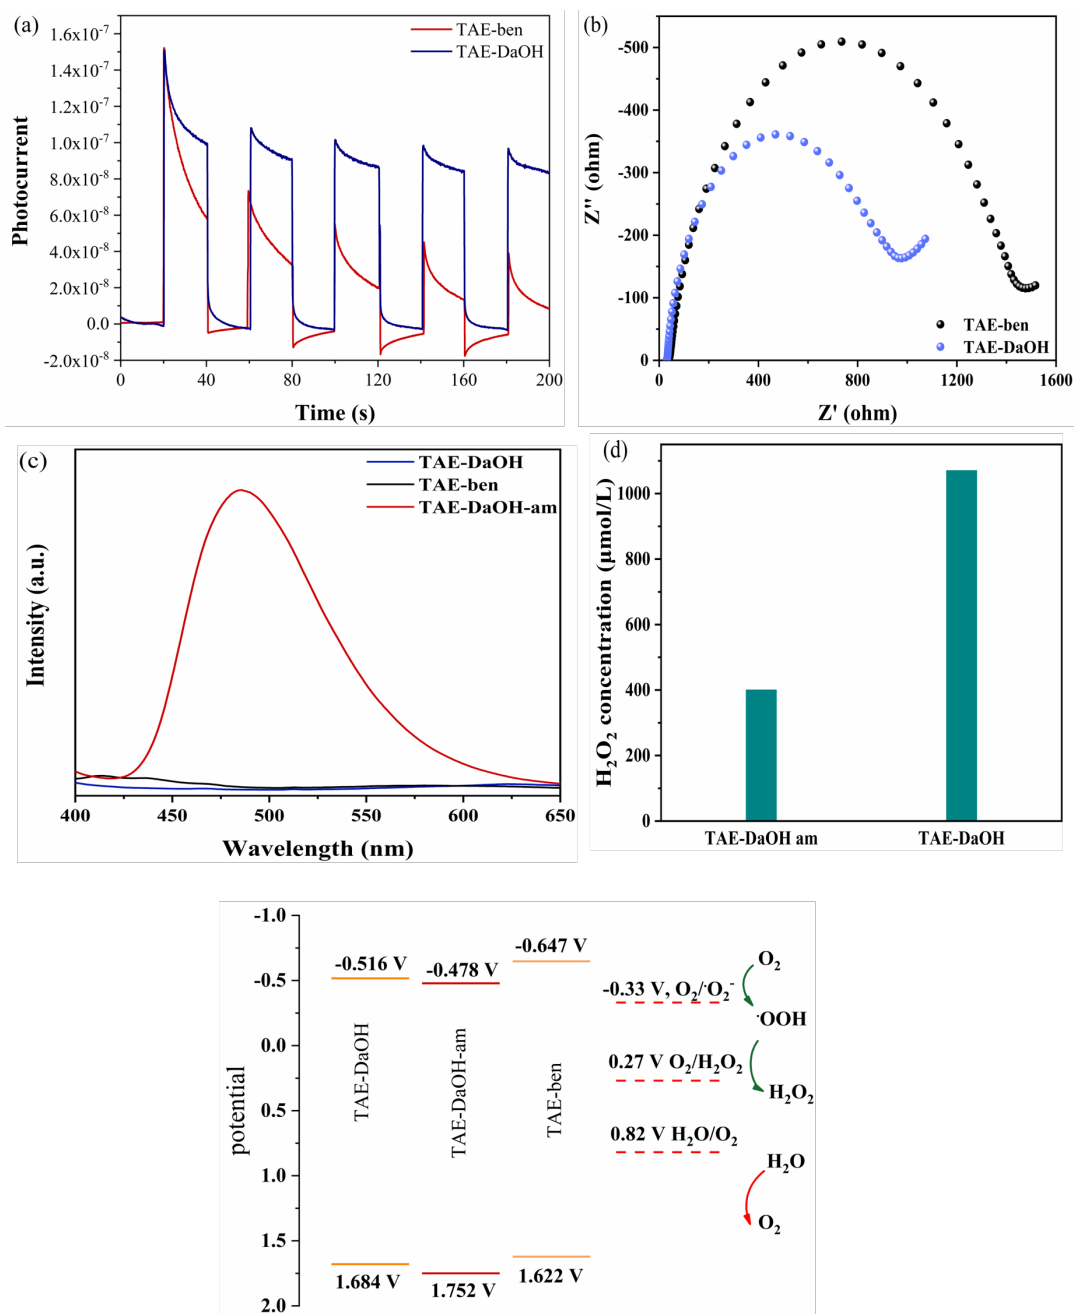

Figure S10. Photochemical property. (a) photocurrent of TAE-DaOH and TAE-ben, (b) EIS of TAE-DaOH and TAE-ben, (c) solid fluorescence of TAE-DaOH, TAE-ben, and TAE-DaOH-am, (d) photocatalytic performance of TAE-DaOH and TAE-dAoh-am,  $m/V = 1\text{g/L}$ ,  $\text{pH} = 7$ , (e) illustration of bandgaps.

### 3. Photocatalytic performance

#### 3.1. Dispersion of catalyst in mixture of BA/water.

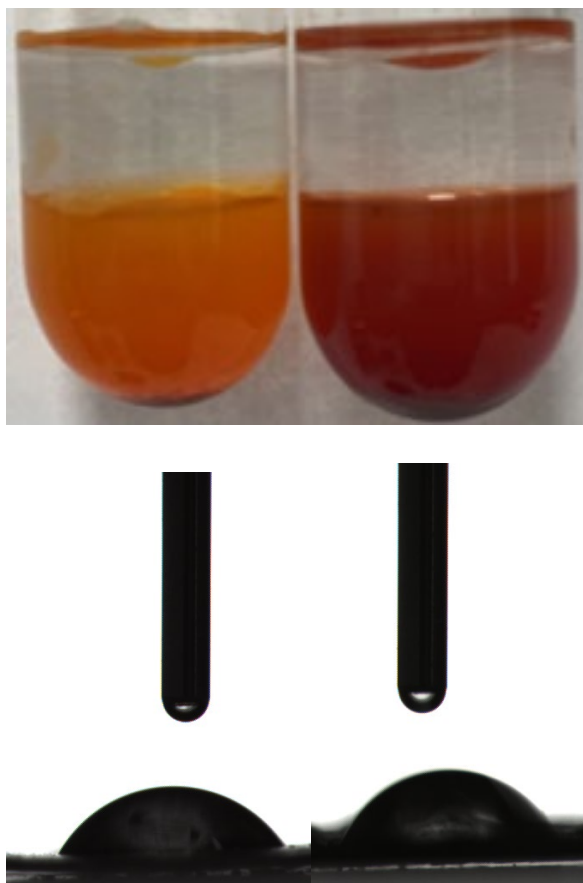

Figure S11. Dispersion of TAE-ben (left) and TAE-DaOH (right) in mixture of BA/water. And contact angle of TAE-ben (left) and TAE-DaOH (right).

### 3.2. Stability of catalyst

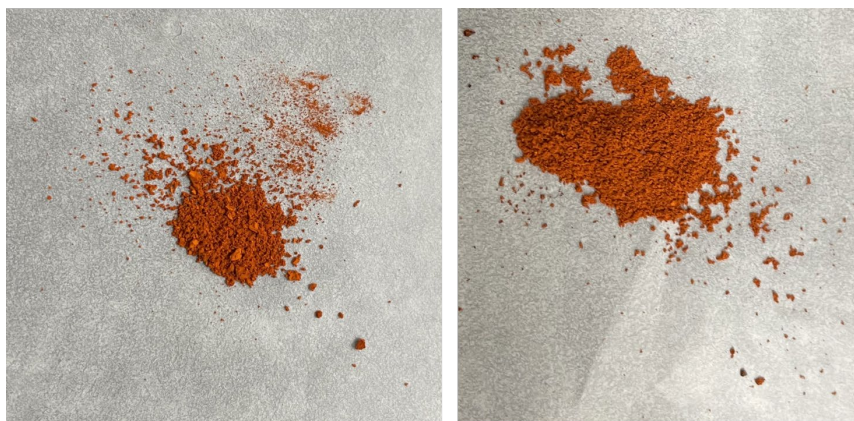

Figure S12. Contrast of TAE-DaOH before and after photocatalysis.

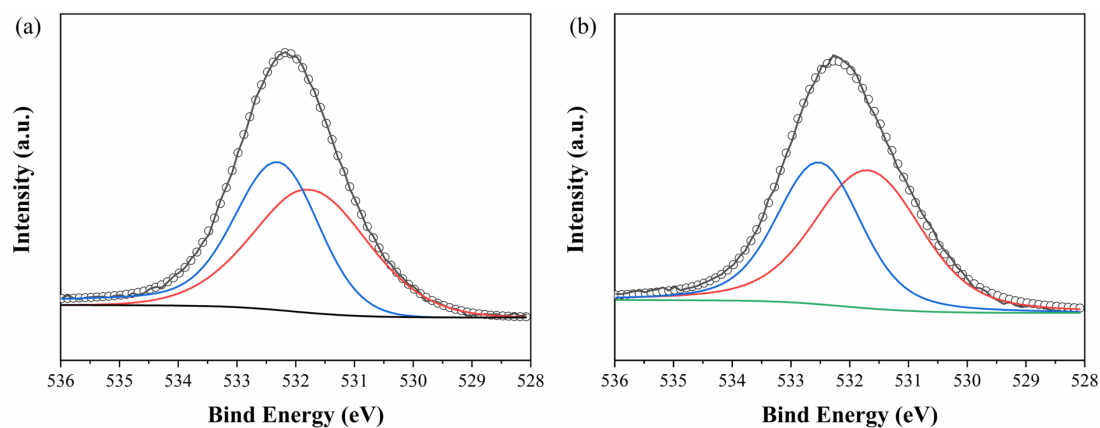

Figure S13. O 1s XPS spectra of TAE-DaOH before and after irradiation.

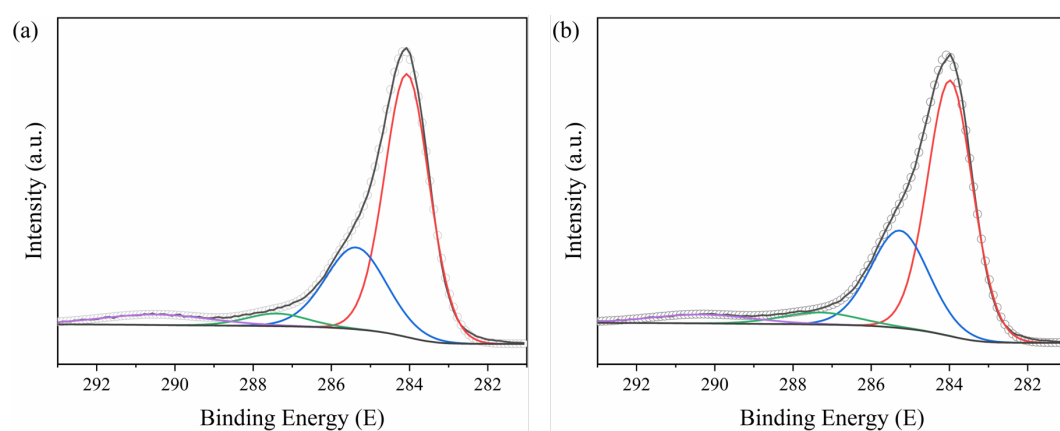

Figure S14. C 1s XPS spectra of TAE-DaOH before and after irradiation

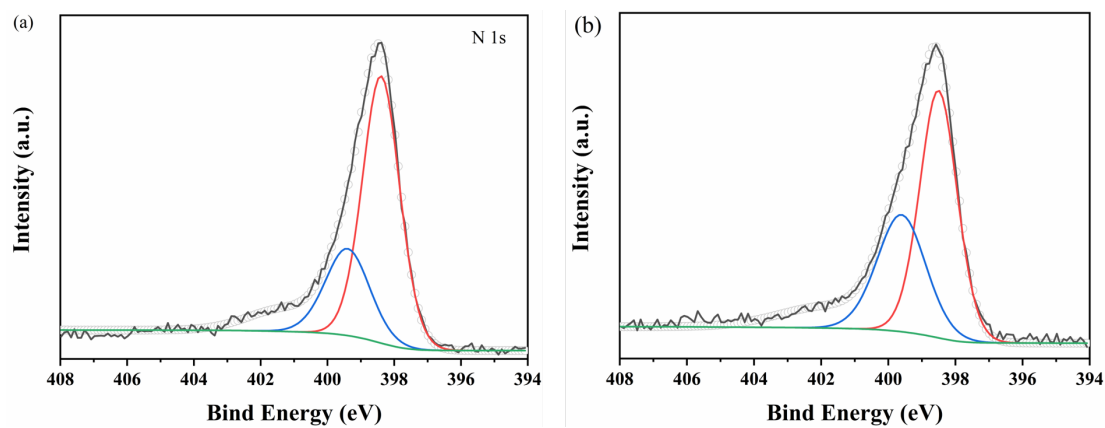

Figure S15. N 1s XPS spectra of TAE-DaOH before and after irradiation.

Experimental condition of figure S11-S16:  $m/V = 1$  g/L, water/BA = 9:1, pH = 7, reaction time per run = 6 h, total runs = 5.

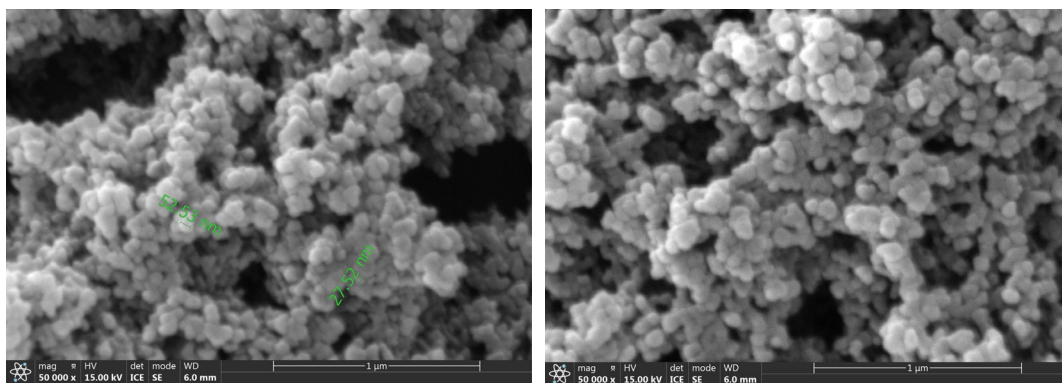

Figure S16. Contrast of SEM of TAE-DaOH after photocatalytic experiment.

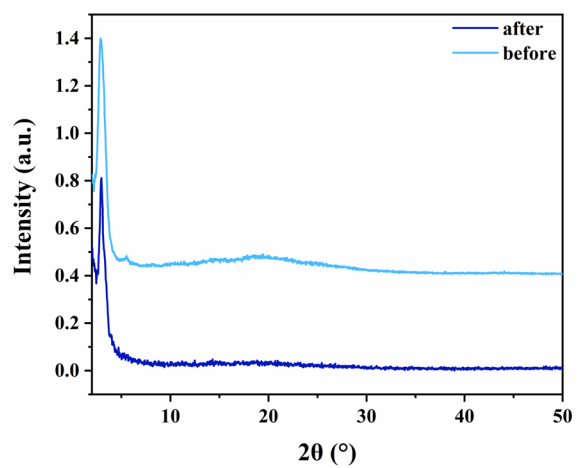

Figure S17. XRD of TAE-DaoH before and after irradiation.

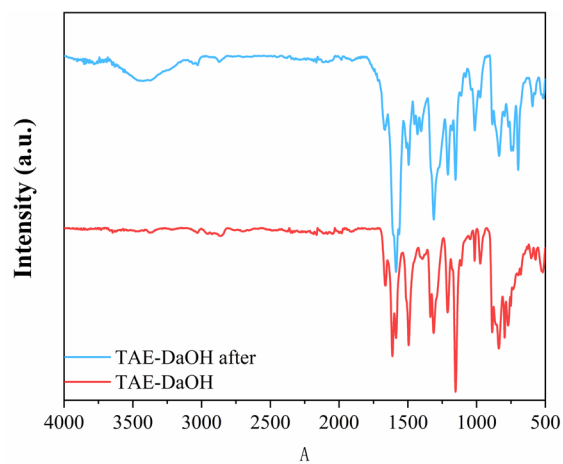

Figure S18. FT-IR of TAE-DaOH before and after irradiation.

### 3.3.Cycling, pH, and solar experiment

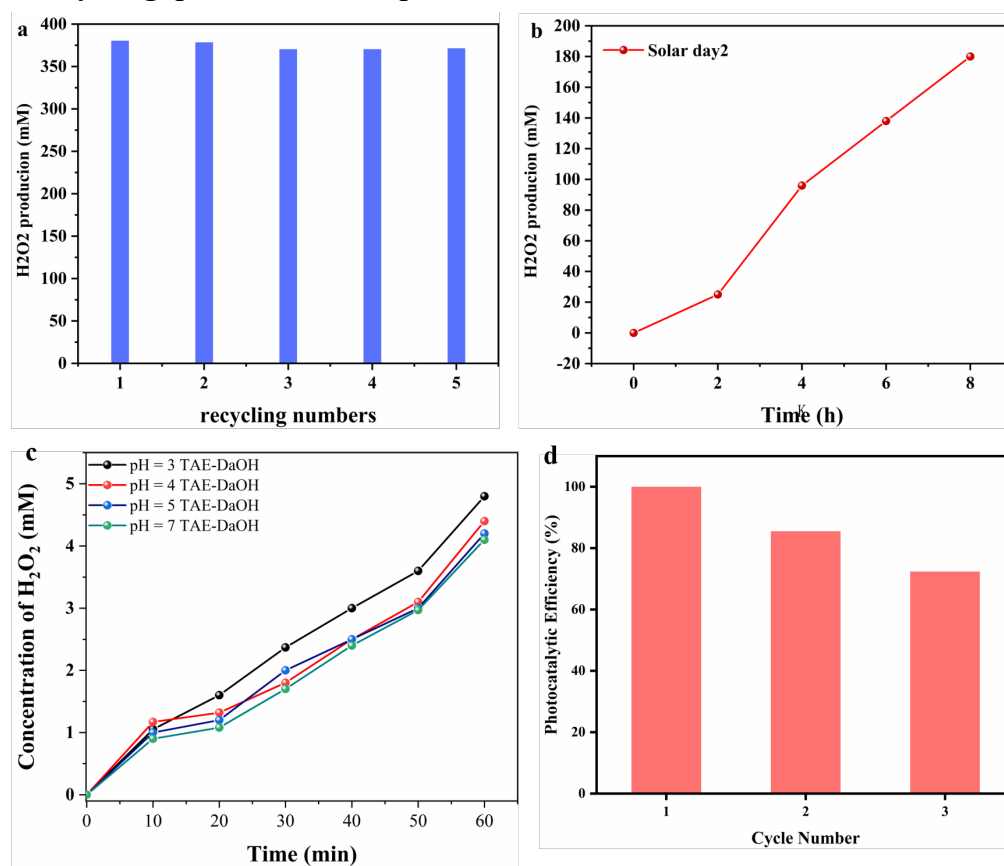

Figure S19.  $m/V = 1$  g/L, water/BA = 5:5, pH = 7 (a) recycling experiment, (b) Solar experiment, (c) pH experiments of TAE-DaOH, (d) recycling experiment of TAE-ben.



## 4. Mechanism studies

### 4.1. Reduction reaction of O<sub>2</sub>

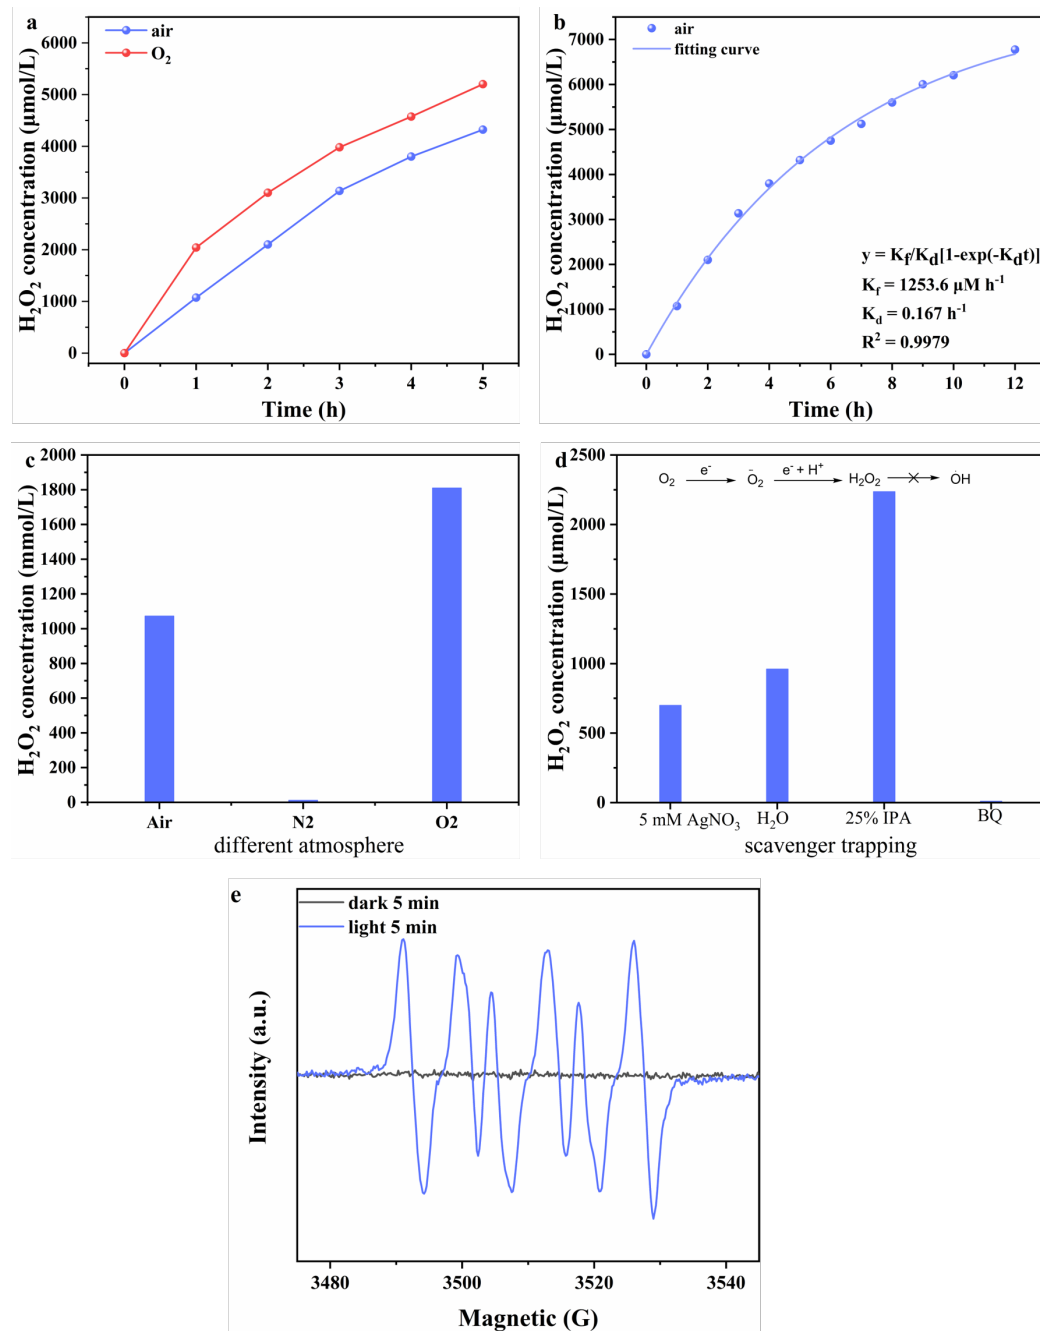

Figure S20. photocatalytic performance for non-sacrificial H<sub>2</sub>O<sub>2</sub> production on different condition,  $m/V = 1\text{g/L}$ ,  $V = 10\text{ mL}$ ,  $\text{pH} = 7$ , light wavelength  $> 320\text{ nm}$ . (a) kinetic curve under air or oxygen in pure water; (b) fitting curve; (c) Photocatalytic performance of TAE-DaOH under different atmosphere, reaction time = 1 h; (d) scavenger trapping experiments, (e) radical experiment trapped by DMPO.

As shown in figure S19b, the experimental data was well fitted with the overall generation equation as follow:

$$[\text{H}_2\text{O}_2] = (\text{K}_f/\text{K}_d)[1-\exp(-k_d t)]$$

Where  $\text{K}_f$  and  $\text{K}_d$  are the composition and decomposition rate constant, respectively.

The resulting  $\text{K}_f$  and  $\text{K}_d$  were derived to be  $1.25 \text{ mM h}^{-1}$  and  $0.167 \text{ h}^{-1}$ , respectively.

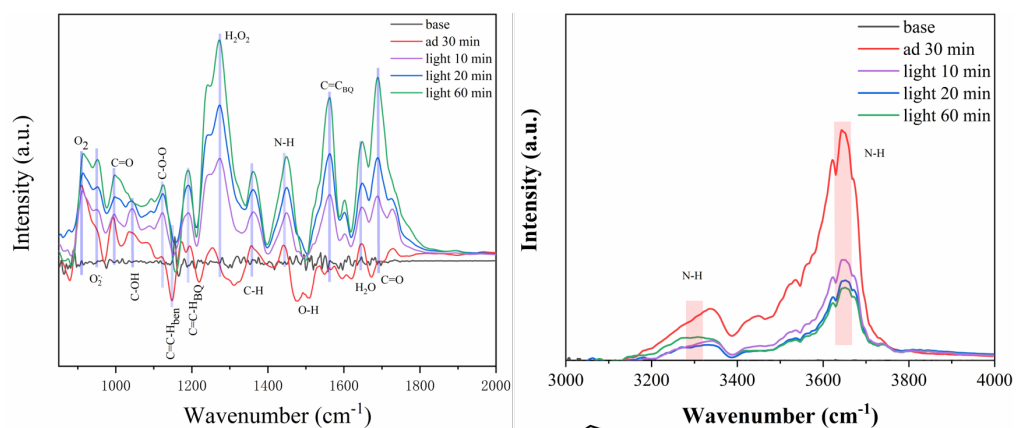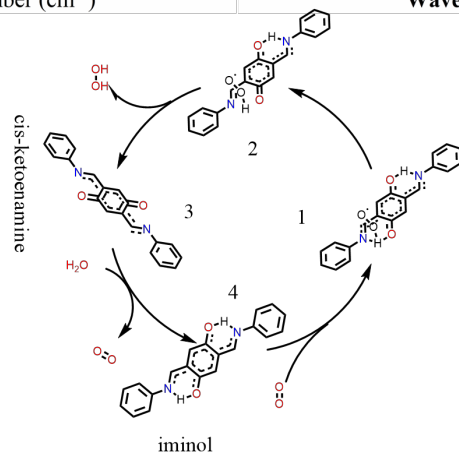

Figure S21. In situ IR of TAE-DaOH.

After adding water, many new peaks were observed, which was attributed to the conversion between iminol and ketoenamine.

## 4.2.Oxidation of BA

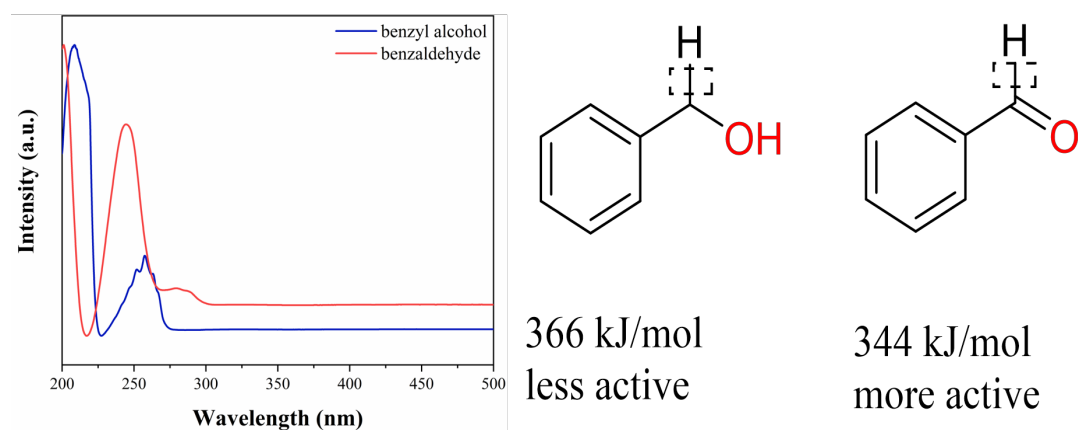

Figure S22. UV absorption of benzyl alcohol and benzaldehyde.

The UV absorption of benzyl alcohol ranges from 200-300 nm as shown in figure S21, which is lower than the wavelength range of Xe lamp. However, the bond dissociation energy (BDE) of  $\alpha$ -C-H in benzyl alcohol is 366 kJ/mol, suggesting that benzyl alcohol was excited by light with 326 nm. The generated benzaldehyde (the BDE of  $\text{PhC(O)-H}$  is 344 kJ/mol) is much more reactive than benzyl alcohol.

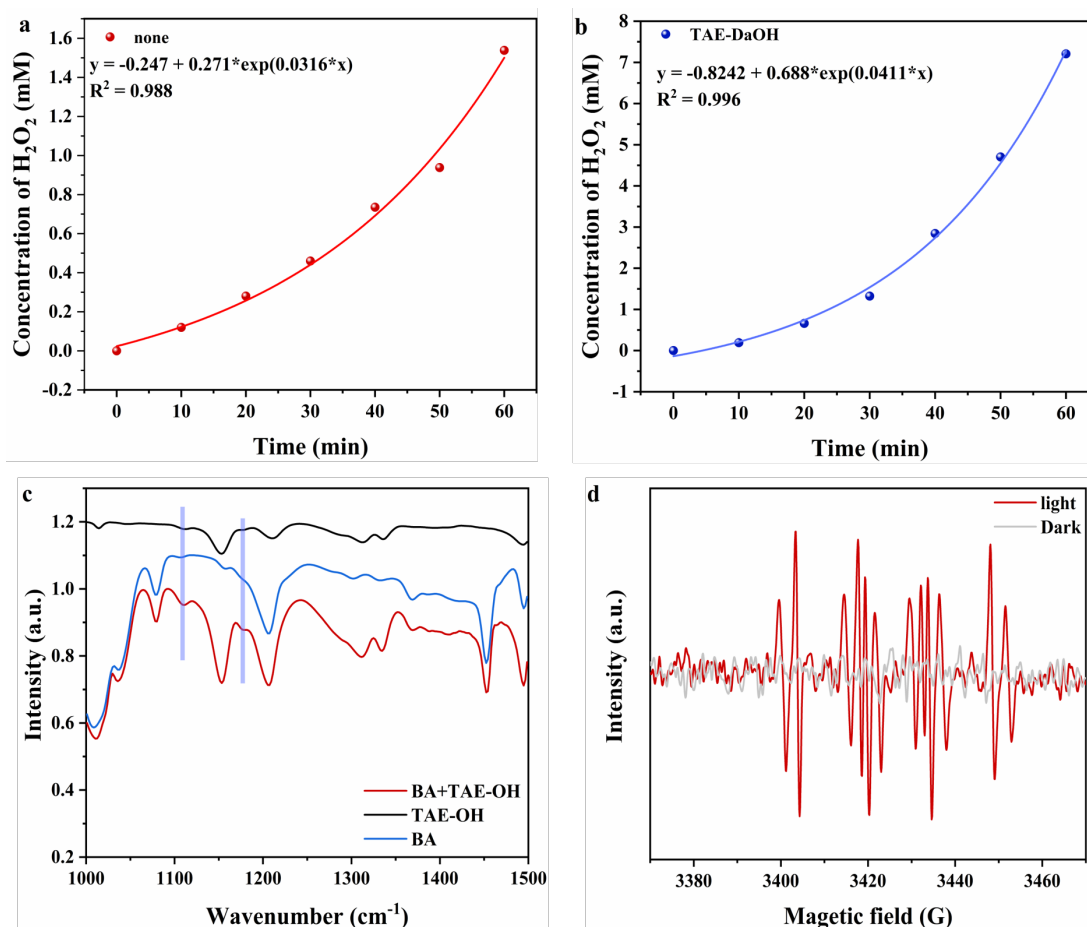

Figure S23. control experiment, V (BA): V (water) = 1:9. (a) generation of  $\text{H}_2\text{O}_2$  in diphasic system without addition of photocatalyst; (b) generation of  $\text{H}_2\text{O}_2$  in diphasic system with adding TAE-DaOH as catalyst; EPR experiment in diphasic system without addition of catalyst; (c) FT-IR of TAE-DaOH, benzyl alcohol, and the mixture of them, respectively; (d) EPR detection of the mixture of BA and water, after illumination, characteristic peaks of  $\alpha$ -hydroxybenzyl radicals were observed in diphasic system without adding catalyst.

the rate of the reaction is expressed as follow<sup>5</sup>:

$$r = \frac{d[\text{H}_2\text{O}_2]}{dt} = K_1[\text{BA}] + K_2[\text{BA}][\text{benzaldehyde}]$$

$$= K_{1\text{obv}} + K_{2\text{obv}}[\text{H}_2\text{O}_2]$$

$$[\text{H}_2\text{O}_2] = K_{1\text{obv}}/K_{2\text{obv}} [\exp(K_{2\text{obv}}t)-1]$$

Where  $K_{1\text{obv}}$  and  $K_{2\text{obv}}$  are the non-autocatalytic rate constant and autocatalytic rate

constant, respectively. The resulting  $K_{1\text{obv}}$  and  $K_{2\text{obv}}$  are  $1.69 \text{ mM h}^{-1}$  and  $2.47 \text{ h}^{-1}$  (figure S22a). As a contrast, the  $K_{1\text{obv}}'$  and  $K_{2\text{obv}}'$  is  $0.51 \text{ mM h}^{-1}$  and  $1.81 \text{ h}^{-1}$  ( $K_{1\text{obv}}'$  and  $K_{2\text{obv}}'$  are the non-autocatalytic rate constant and autocatalytic rate constant in control experiment without adding TAE-DaOH, figure S23b). Furthermore, the concentration of  $\text{H}_2\text{O}_2$  when TAE-DaOH worked as catalyst was much higher than that without any catalyst in diphasic system (figure 3b). Benzyl alcohol was excited by light with  $326 \text{ nm}^6$  and reacted with  $\text{O}_2$  to generate  $\alpha$ -hydroxybenzyl radicals and  $\cdot\text{OOH}$ , followed by formation of benzaldehyde and  $\text{H}_2\text{O}_2$ . The result was further confirmed by EPR. After illumination, characteristic peaks of  $\alpha$ -hydroxybenzyl radicals were observed in diphasic system without adding catalyst (figure S22d). However, the generation of  $\alpha$ -hydroxybenzyl radicals from BA is unactive, resulting in low generation of  $\text{H}_2\text{O}_2$ . Intermolecular hydrogen bond between TAE-DaOH and BA can enhance the interaction between holes and BA, leading to fast production of both  $\alpha$ -hydroxybenzyl radicals and benzaldehyde<sup>7</sup>. As a result, the generation of  $\text{H}_2\text{O}_2$  when TAE-DaOH worked as catalyst was much higher than that without catalyst in diphasic system.

As shown in figure S23c, redshift was observed. Peaks at  $1153 \text{ cm}^{-1}$  and  $1205 \text{ cm}^{-1}$  shifted to  $1108 \text{ cm}^{-1}$  and  $1177 \text{ cm}^{-1}$ .

### 4.3.autocatalysis

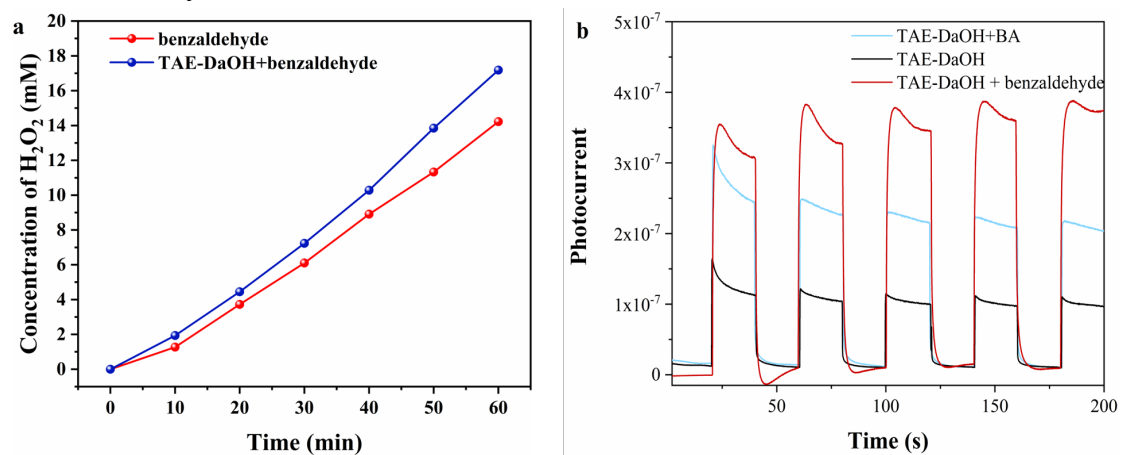

Figure S24. Role of benzaldehyde. (a) control experiment, V (BA): V (water) = 1:9, m/V = 1g/L, (b) photocurrent under different condition.

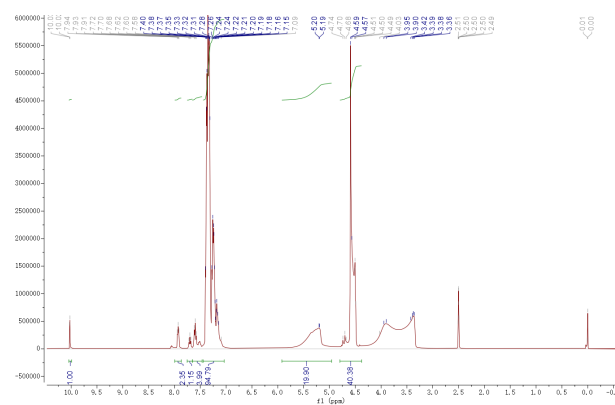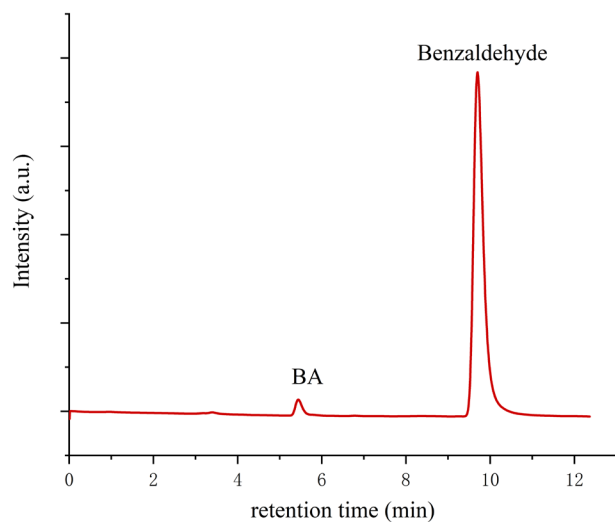

Figure S25.  $^1\text{H-NMR}$  and HPLC after irradiation. The characteristic peak of benzaldehyde (10.0 ppm) is observed from NMR, demonstrating the generation of benzaldehyde. It is similar in HPLC.



#### 4.4. intramolecular hydrogen bond: suppression both decomposition of H<sub>2</sub>O<sub>2</sub> and oxidation of catalysis

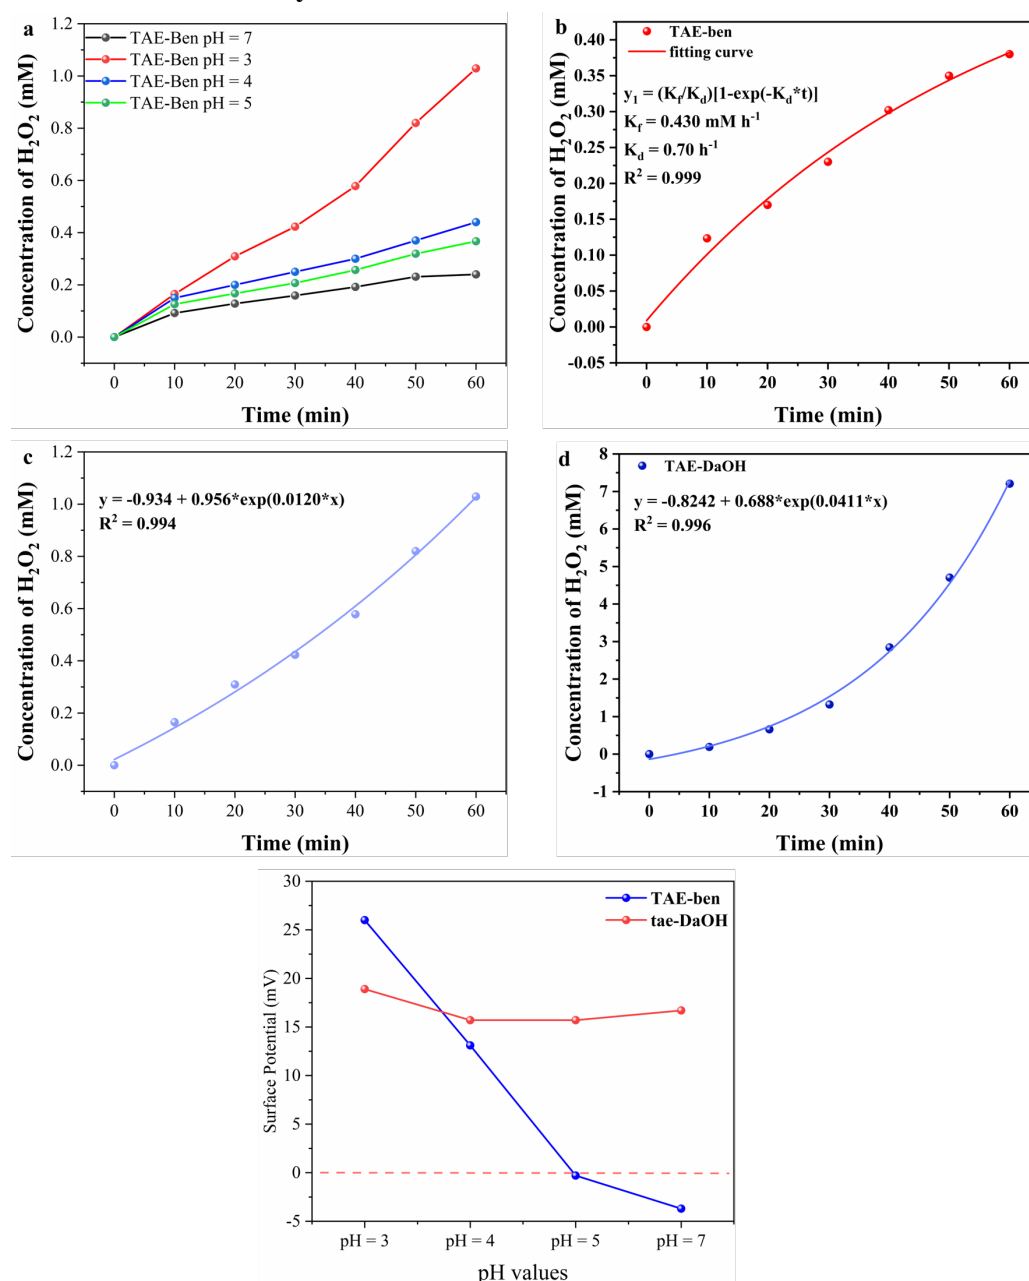

Figure S26. Contrast of reaction curve of TAE-ben. (a) performance of TAE-ben at different pH values, m/V = 1 g/L, BA/water = 1:9, (b), (c), (d) fitting curve of TAE-ben at pH = 7, TAE-ben at

pH = 3, and TAE-DaOH, respectively; (e) surface potential of TAE-ben and TAE-DaOH at different pH values,  $m/V = 1 \text{ g/L}$ .

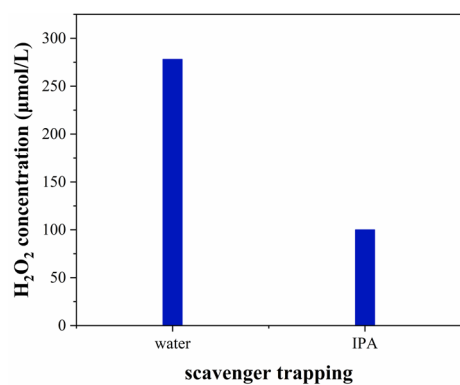

Figure S27. Scavenger trapping experiment. TAE-ben was catalyst,  $m/V = 1 \text{ g/L}$ ,  $V(\text{IPA})/V(\text{water}) = 1:9$ .

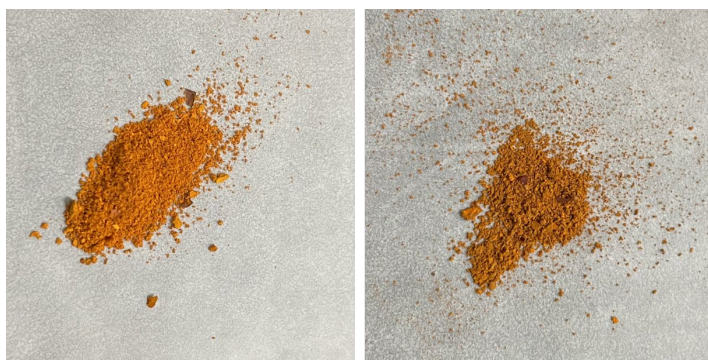

Figure S28. Contrast of TAE-ben before and after photocatalysis.

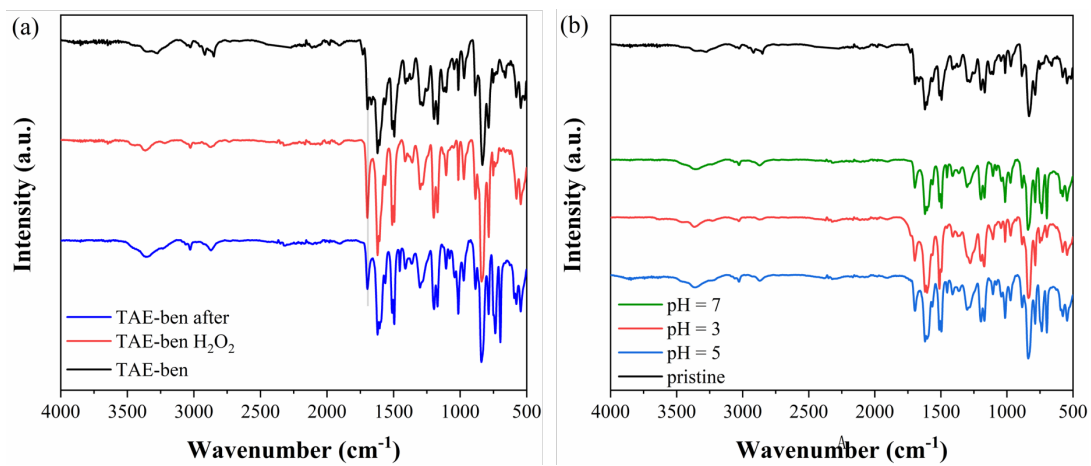

Figure S29. FT-IR of TAE-ben before and after irradiation.

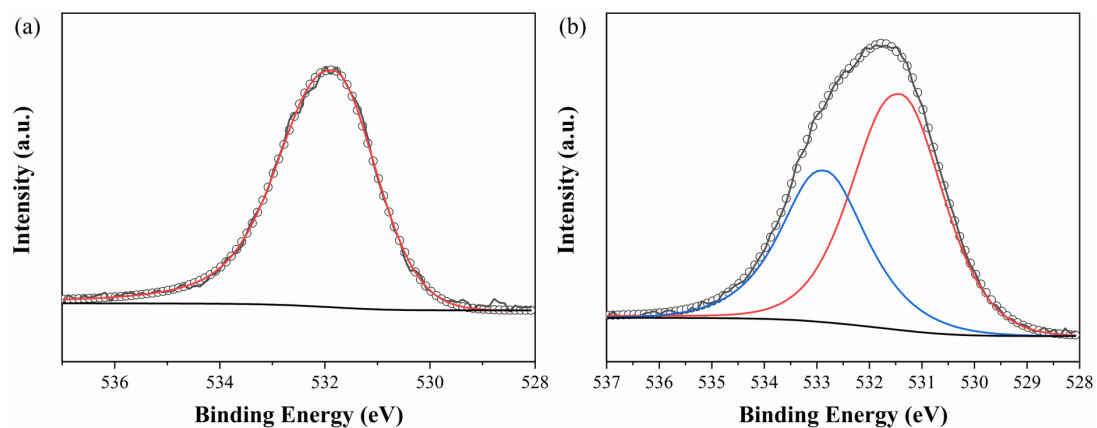

Figure S30. O 1s XPS spectra of TAE-ben before and after irradiation., the peaks at 531.8 eV (figure a) and 531.5 eV are characteristic one of H<sub>2</sub>O, while the presence of peak at 532.9 eV is attributed to amide.

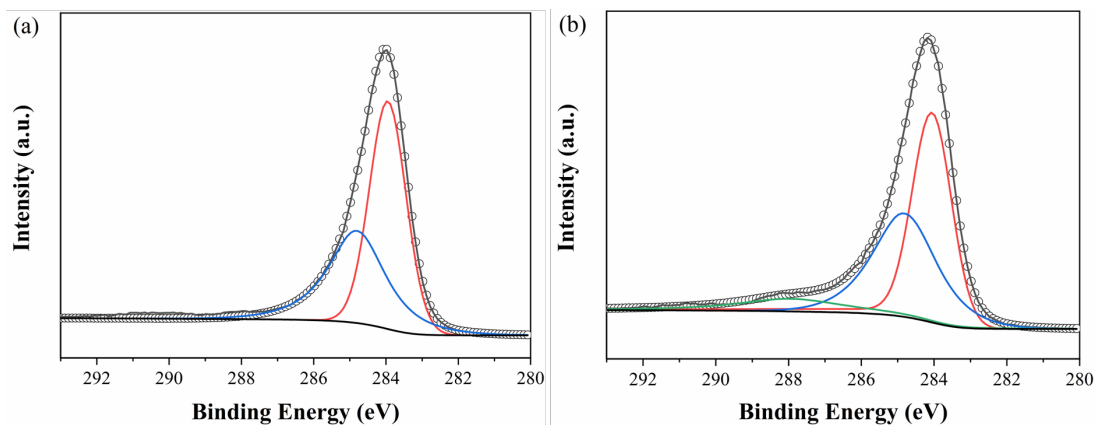

Figure S31. C 1s XPS spectra of TAE-ben before and after irradiation.

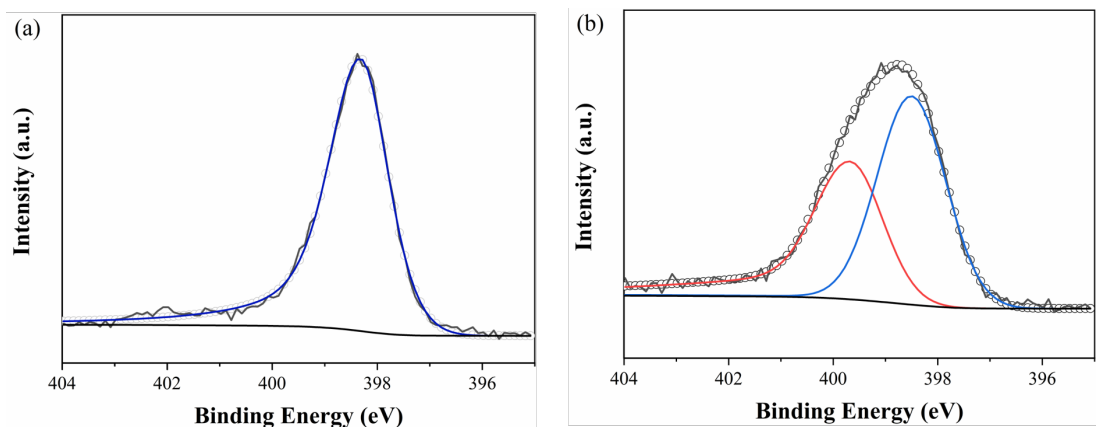

Figure S32. N 1s XPS spectra of TAE-ben before and after irradiation.

Experimental condition of figure S23-S26: m/V = 1 g/L, water/BA = 9:1, pH = 7, reaction time per run = 6 h, total runs = 3, total time = 18 h.

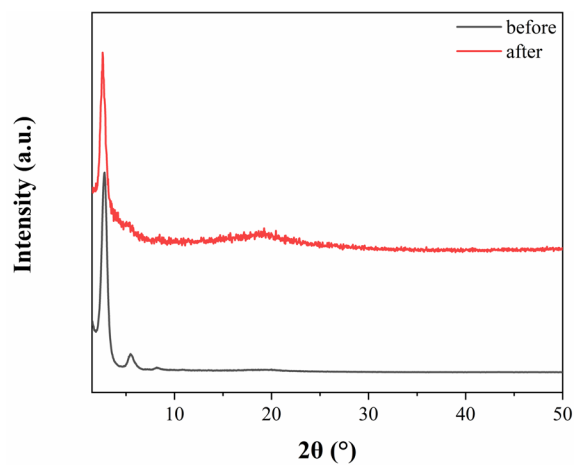

Figure S33. XRD of TAE-ben before and after irradiation.

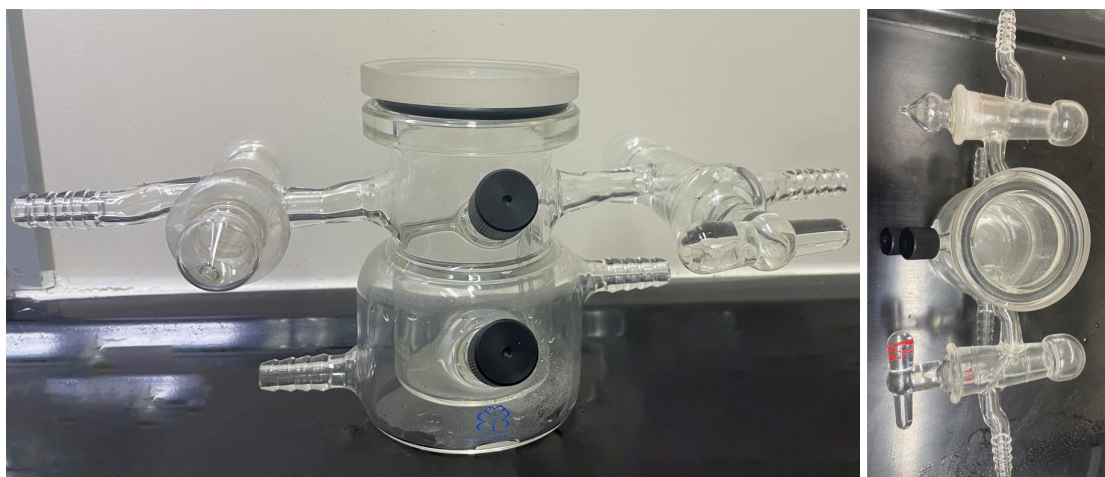

Figure S34. Photo-reaction vessel with radius 2.25 cm. The radius of stir bar is 0.5 cm.

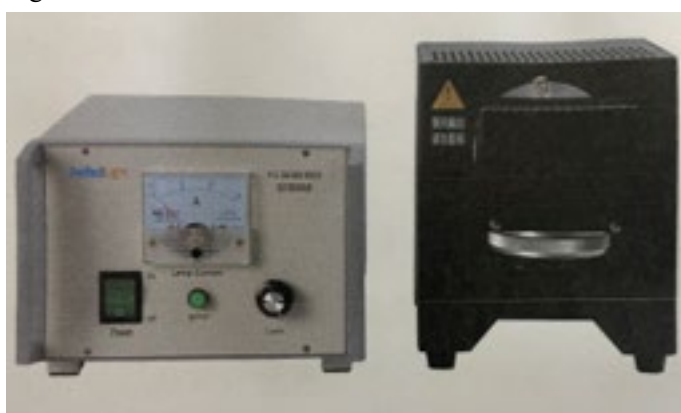

Figure S35. PLS-SXE 300/300 UV Xe lamp purchased from perfect light company.

## 5. Comparison with other photocatalysts

| Catalyst                                                     | Reaction conditions                                                                                                                         | Rate<br>$\mu\text{mol h}^{-1} \text{g}_{\text{cat}}^{-1}$ | SCC<br>efficiency | Ref          |
|--------------------------------------------------------------|---------------------------------------------------------------------------------------------------------------------------------------------|-----------------------------------------------------------|-------------------|--------------|
| g-C <sub>3</sub> N <sub>4</sub>                              | O <sub>2</sub> ; 90 vol % of ethanol,<br>Xe-lamp 420–500 nm                                                                                 | 125                                                       | N/A               | 8            |
| g-C <sub>3</sub> N <sub>4</sub> /PDI/r<br>GO <sub>0.05</sub> | O <sub>2</sub> ; in the pure water;<br>Xe-lamp $\lambda > 420$ nm                                                                           | 24.17                                                     | 0.2               | 9            |
| AQ-augmented<br>g-C <sub>3</sub> N <sub>4</sub>              | O <sub>2</sub> ; 10 vol % of isopropanol,<br>AM 1.5                                                                                         | 361                                                       | 0.178             | 10           |
| Sb-SAPC15                                                    | O <sub>2</sub> ; in pure water;<br>Xe lamp $\lambda > 420$ nm                                                                               | 588.1                                                     | 0.61              | 11           |
| AKMT                                                         | O <sub>2</sub> ; 0.5 g/L (catalyst), 10 vol% ethanol<br>in water; pH=3, AM 1.5G, 298 K                                                      | 6820                                                      | N/A               | 12           |
| Resorcinol-<br>formaldehyde<br>resins                        | O <sub>2</sub> ; in the pure water;<br>Xe-lamp $\lambda > 420$ nm                                                                           | 82.5                                                      | 0.5               | 13           |
| Ni/MIL-125-NH <sub>2</sub>                                   | O <sub>2</sub> ; 20% of benzyl alcohol in acetonitrile;<br>Xe-lamp, $\lambda > 420$ nm                                                      | 937                                                       | N/A               | 14           |
| MIL-125- R7                                                  | O <sub>2</sub> ; the two-phase system composed of<br>benzyl alcohol (5.0 mL) and water (2.0<br>mL);<br>Xe-lamp 500 W, $\lambda \geq 420$ nm | 800                                                       | N/A               | 15           |
| TiO <sub>2</sub>                                             | O <sub>2</sub> ; alcohols (1.75 mmol) in 5 ml<br>water;<br>Hg-lamp $\lambda > 280$ nm                                                       | 10.9                                                      | N/A               | 16           |
| COF-TfpBpy                                                   | O <sub>2</sub> ; pure water;<br>Xe-lamp $\lambda \geq 420$ nm                                                                               | 2084                                                      | 0.57              | 17           |
| TPB-DMTP-COF                                                 | O <sub>2</sub> ; three phase system<br>Xe-lamp $\lambda \geq 420$ nm                                                                        | 2882                                                      | N/A               | 18           |
| CTF-Ph                                                       | O <sub>2</sub> ; 50 vol% of benzyl alcohol in<br>acetonitrile containing 0.96 wt% of<br>water;<br>AM 1.5G                                   | 46933                                                     | 1.097             | 19           |
| TAE-ben                                                      | air; 10 vol% of benzyl alcohol in<br>water;<br>AM 1.5G                                                                                      | 280                                                       | N/A               | This<br>work |
| TAE-DaOH                                                     | air; 50 vol% of benzyl alcohol in<br>water;<br>AM 1.5G                                                                                      | 61300                                                     | N/A               | This<br>work |
| TAE-DaOH                                                     | air; 50 vol% of benzyl alcohol in<br>water;<br>Solar light                                                                                  | 26760                                                     | N/A               | This<br>work |



## 6. Computational part

### 6.1 Computation Methods:

All density functional theory (DFT) calculations were performed through the Gaussian 09 software. Optimized geometries and harmonic frequencies of all the structures using the PCM implicit solvation (water) model were obtained at the UB3LYP/6-31G(d,p) level of theory with Grimme's D3 dispersion correction (with the Becke-Johnson damping). Normal mode analyses were performed to all optimized structures, to confirm that these structures are corresponding to local minima (no imaginary frequencies) or saddle point (unique imaginary frequency) on the potential energy surface. Each transition state was further verified by the intrinsic reaction coordinate (IRC) calculations.

### 6.2 The supplementary discussion of oxidation reaction of catalyst models by resulted $\text{H}_2\text{O}_2$

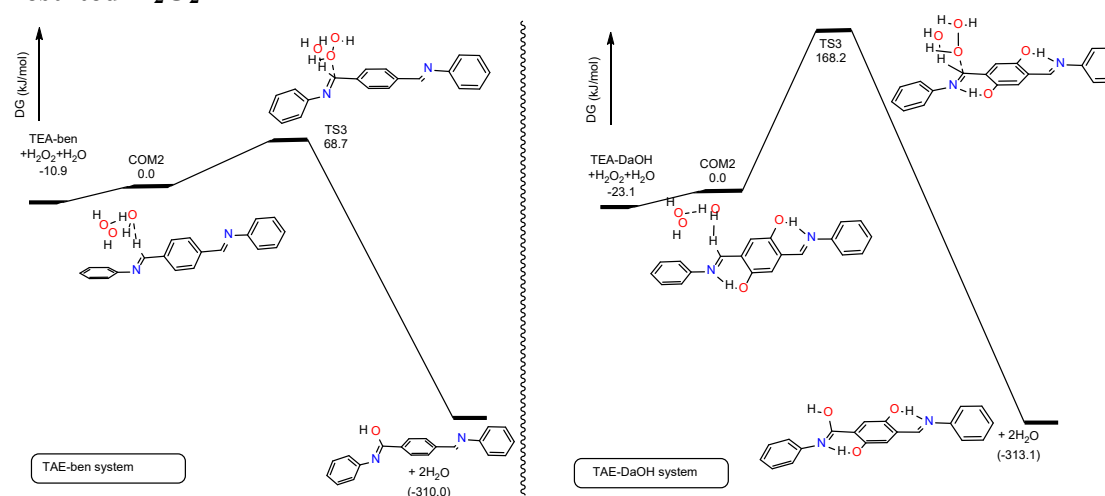

Figure S36. Oxidation mechanism of the TAE-ben and TAE-DaOH and the energy (in kJ/mol) diagram for two systems.

DFT calculation in Figure S35 indicates that TAE-ben catalyst could be oxidized by resulted  $\text{H}_2\text{O}_2$  with a relatively small energy barrier of 68.7 kJ/mol, while the oxidation of TAE-DaOH is hindered in kinetics with a rather larger barrier of 168.2 kJ/mol. It means that TAE-ben is unstable during the production of  $\text{H}_2\text{O}_2$  and cannot steadily convert  $\text{O}_2$  to  $\text{H}_2\text{O}_2$ , which is in accordance with the observation in the present experiments. In addition, spin contamination  $\langle s^2 \rangle$  of 0.983 and the longer O-O bond (2.272 Å) of TS3 in TAE-ben system feature the  $\text{H}_2\text{O}_2$  moiety of typical diradical properties. For TAE-DaOH system, the  $\text{H}_2\text{O}_2$  moiety remains the close-shell electron configuration with the shorter O-O bond of 1.908 Å in TS3. The above results imply that the hydrogen-bond in TAE-DaOH stabilizes  $\text{H}_2\text{O}_2$  in the reaction and therefore guarantees the high yield of  $\text{H}_2\text{O}_2$ .

### 6.3 TAE-ben system

Summarized energy of all species of TAE-ben system in Figure 2

| species | ZPG(a.u.) | ZPG-corrected Gibbs energy (a.u.) | $\Delta G$ (kJ/mol) |
|---------|-----------|-----------------------------------|---------------------|
|---------|-----------|-----------------------------------|---------------------|

|                                           |           |              |       |
|-------------------------------------------|-----------|--------------|-------|
| TAE                                       | 0.259627  | -881.088508  |       |
| PhCH <sub>2</sub> OH                      | 0.102128  | -346.709719  |       |
| O <sub>2</sub>                            | -0.016201 | -150.33335   |       |
| TAE+ PhCH <sub>2</sub> OH+ O <sub>2</sub> | 0.345554  | -1378.131577 | 3.6   |
| IM1                                       | 0.376663  | -1378.132941 | 0.0   |
| TS1                                       | 0.372594  | -1378.060788 | 189.3 |
| IM2                                       | 0.376962  | -1378.068293 | 169.6 |
| TS2                                       | 0.370518  | -1378.037415 | 250.7 |
| IM3                                       | 0.384472  | -1378.169117 | -94.9 |
|                                           |           |              |       |
| PhCHO                                     | 0.079619  | -345.526192  |       |
| H <sub>2</sub> O <sub>2</sub>             | 0.0041    | -151.544838  |       |
| TAE+ PhCHO+ O <sub>2</sub>                | 0.343346  | -1378.159538 | -69.8 |

Summarized energy of all species of TAE-ben system in Figure 3

| species                                | ZPG(a.u.) | ZPG-corrected<br>Gibbs energy (a.u.) | $\Delta G$ (kJ/mol) |
|----------------------------------------|-----------|--------------------------------------|---------------------|
| TAE                                    | 0.259627  | -881.088508                          |                     |
| H <sub>2</sub> O                       | 0.003015  | -76.422682                           |                     |
| O <sub>2</sub>                         | -0.016201 | -150.33335                           |                     |
| TAE+ H <sub>2</sub> O + O <sub>2</sub> | 0.345554  | -1378.131577                         | 3.6                 |
| COM <sub>2</sub>                       | 0.298893  | -1109.051874                         | 0.0                 |
| TS3                                    | 0.372594  | -1378.060788                         | 189.3               |
| Product+2H <sub>2</sub> O              | 0.267386  | -1109.170151                         | -310.0              |

### Optimized structures of TAE-ben system

TAE-ben(singlet state)

Standard orientation:

| Center<br>Number | Atomic<br>Number | Atomic<br>Type | Coordinates (Angstroms) |           |           |
|------------------|------------------|----------------|-------------------------|-----------|-----------|
|                  |                  |                | X                       | Y         | Z         |
| 1                | 6                | 0              | -6.972374               | 1.212812  | 0.694549  |
| 2                | 6                | 0              | -5.594660               | 1.004362  | 0.677342  |
| 3                | 6                | 0              | -5.062185               | -0.114117 | 0.013279  |
| 4                | 6                | 0              | -5.931848               | -1.029094 | -0.600497 |
| 5                | 6                | 0              | -7.306912               | -0.808184 | -0.587801 |
| 6                | 6                | 0              | -7.832743               | 0.314280  | 0.057922  |
| 7                | 7                | 0              | -3.684846               | -0.396338 | -0.039045 |
| 8                | 6                | 0              | -2.802504               | 0.548213  | -0.040650 |
| 9                | 6                | 0              | -1.381454               | 0.255034  | -0.042865 |
| 10               | 6                | 0              | -0.462895               | 1.317295  | -0.045100 |

|    |   |   |           |           |           |
|----|---|---|-----------|-----------|-----------|
| 11 | 6 | 0 | 0.909895  | 1.089491  | -0.044015 |
| 12 | 6 | 0 | -0.909779 | -1.089495 | -0.045067 |
| 13 | 6 | 0 | 0.463011  | -1.317311 | -0.046104 |
| 14 | 6 | 0 | 1.381576  | -0.255048 | -0.042724 |
| 15 | 6 | 0 | 2.802651  | -0.548120 | -0.040977 |
| 16 | 7 | 0 | 3.684834  | 0.396591  | -0.039878 |
| 17 | 6 | 0 | 5.062170  | 0.114433  | 0.012667  |
| 18 | 6 | 0 | 5.594240  | -1.002640 | 0.679291  |
| 19 | 6 | 0 | 5.932156  | 1.027713  | -0.603189 |
| 20 | 6 | 0 | 7.307143  | 0.806294  | -0.589911 |
| 21 | 6 | 0 | 7.832638  | -0.314729 | 0.058582  |
| 22 | 6 | 0 | 6.971881  | -1.211501 | 0.697213  |
| 23 | 1 | 0 | -7.376014 | 2.074675  | 1.217037  |
| 24 | 1 | 0 | -7.969492 | -1.516036 | -1.076088 |
| 25 | 1 | 0 | -8.905139 | 0.480346  | 0.077195  |
| 26 | 1 | 0 | -3.090202 | 1.604571  | -0.054981 |
| 27 | 1 | 0 | -0.822956 | 2.341352  | -0.044953 |
| 28 | 8 | 0 | -1.755091 | -2.141508 | -0.048787 |
| 29 | 1 | 0 | 0.823068  | -2.341372 | -0.047316 |
| 30 | 1 | 0 | 3.090618  | -1.604441 | -0.055142 |
| 31 | 1 | 0 | 4.935534  | -1.684648 | 1.206819  |
| 32 | 1 | 0 | 5.510287  | 1.895951  | -1.099262 |
| 33 | 1 | 0 | 7.969936  | 1.512773  | -1.079906 |
| 34 | 1 | 0 | 8.904981  | -0.481008 | 0.078443  |
| 35 | 1 | 0 | 7.375105  | -2.072297 | 1.221782  |
| 36 | 1 | 0 | -4.936416 | 1.687694  | 1.203790  |
| 37 | 1 | 0 | -5.509517 | -1.898293 | -1.094462 |
| 38 | 1 | 0 | -2.679435 | -1.759633 | -0.053909 |
| 39 | 8 | 0 | 1.755112  | 2.141584  | -0.046889 |
| 40 | 1 | 0 | 2.679505  | 1.759867  | -0.052841 |

-----

COM1(triplet state)

Standard orientation:

| Center<br>Number | Atomic<br>Number | Atomic<br>Type | Coordinates (Angstroms) |           |           |
|------------------|------------------|----------------|-------------------------|-----------|-----------|
|                  |                  |                | X                       | Y         | Z         |
| 1                | 8                | 0              | -2.510854               | 2.231618  | -0.302630 |
| 2                | 8                | 0              | -2.980594               | 2.159364  | -1.420591 |
| 3                | 6                | 0              | -7.422815               | -1.245653 | 1.127077  |
| 4                | 6                | 0              | -6.059809               | -1.361106 | 0.860174  |
| 5                | 6                | 0              | -5.482709               | -0.608689 | -0.176550 |
| 6                | 6                | 0              | -6.293493               | 0.233088  | -0.953583 |

|    |   |   |           |           |           |
|----|---|---|-----------|-----------|-----------|
| 7  | 6 | 0 | -7.652472 | 0.351463  | -0.672733 |
| 8  | 6 | 0 | -8.222383 | -0.386421 | 0.368730  |
| 9  | 7 | 0 | -4.117359 | -0.677597 | -0.506761 |
| 10 | 6 | 0 | -3.215324 | -0.863878 | 0.399287  |
| 11 | 6 | 0 | -1.809697 | -0.950853 | 0.054069  |
| 12 | 6 | 0 | -0.860095 | -1.125422 | 1.074821  |
| 13 | 6 | 0 | 0.496383  | -1.184081 | 0.790002  |
| 14 | 6 | 0 | -1.378022 | -0.835428 | -1.298314 |
| 15 | 6 | 0 | -0.015235 | -0.902430 | -1.578408 |
| 16 | 6 | 0 | 0.931028  | -1.068456 | -0.558186 |
| 17 | 6 | 0 | 2.344424  | -1.074981 | -0.888530 |
| 18 | 7 | 0 | 3.236825  | -1.213962 | 0.034585  |
| 19 | 6 | 0 | 4.616655  | -1.165873 | -0.226275 |
| 20 | 6 | 0 | 5.180013  | -0.582926 | -1.374855 |
| 21 | 6 | 0 | 5.462385  | -1.703966 | 0.755613  |
| 22 | 6 | 0 | 6.844673  | -1.686922 | 0.583093  |
| 23 | 6 | 0 | 7.400164  | -1.117210 | -0.564922 |
| 24 | 6 | 0 | 6.562389  | -0.563026 | -1.537912 |
| 25 | 1 | 0 | -7.863591 | -1.836849 | 1.923891  |
| 26 | 1 | 0 | -8.268998 | 1.015290  | -1.270841 |
| 27 | 1 | 0 | -9.283749 | -0.302503 | 0.579520  |
| 28 | 1 | 0 | -3.472135 | -0.935112 | 1.461229  |
| 29 | 1 | 0 | -1.184971 | -1.197248 | 2.107972  |
| 30 | 8 | 0 | 1.385607  | -1.314972 | 1.810226  |
| 31 | 8 | 0 | -2.249754 | -0.650812 | -2.308989 |
| 32 | 1 | 0 | 0.312737  | -0.800549 | -2.607874 |
| 33 | 1 | 0 | 2.606014  | -0.961357 | -1.943715 |
| 34 | 1 | 0 | 4.545235  | -0.115108 | -2.117817 |
| 35 | 1 | 0 | 5.015853  | -2.137524 | 1.644754  |
| 36 | 1 | 0 | 7.487790  | -2.112229 | 1.347167  |
| 37 | 1 | 0 | 8.477241  | -1.093889 | -0.696711 |
| 38 | 1 | 0 | 6.989099  | -0.101848 | -2.423273 |
| 39 | 1 | 0 | -5.449966 | -2.053710 | 1.431192  |
| 40 | 1 | 0 | -5.835532 | 0.799838  | -1.757809 |
| 41 | 1 | 0 | -3.160213 | -0.609610 | -1.893704 |
| 42 | 1 | 0 | 2.301005  | -1.311094 | 1.379422  |
| 43 | 6 | 0 | 3.850036  | 2.136206  | 0.345834  |
| 44 | 6 | 0 | 2.908406  | 1.982384  | 1.362547  |
| 45 | 6 | 0 | 1.538145  | 2.040986  | 1.079879  |
| 46 | 6 | 0 | 1.127566  | 2.236776  | -0.242321 |
| 47 | 6 | 0 | 2.067489  | 2.386824  | -1.263541 |
| 48 | 6 | 0 | 3.432173  | 2.343139  | -0.970909 |
| 49 | 6 | 0 | 0.515565  | 1.912457  | 2.192559  |
| 50 | 8 | 0 | 0.932569  | 1.076982  | 3.261481  |

|    |   |   |           |          |           |
|----|---|---|-----------|----------|-----------|
| 51 | 1 | 0 | -0.438338 | 1.573350 | 1.763017  |
| 52 | 1 | 0 | 0.330911  | 2.899326 | 2.636108  |
| 53 | 1 | 0 | 1.145908  | 0.207188 | 2.874126  |
| 54 | 1 | 0 | 4.909555  | 2.078780 | 0.575529  |
| 55 | 1 | 0 | 3.225175  | 1.804004 | 2.385083  |
| 56 | 1 | 0 | 0.067329  | 2.252314 | -0.477030 |
| 57 | 1 | 0 | 1.733820  | 2.528405 | -2.287342 |
| 58 | 1 | 0 | 4.165111  | 2.457603 | -1.763526 |

-----

TS1(triplet state)

Standard orientation:

| Center<br>Number | Atomic<br>Number | Atomic<br>Type | Coordinates (Angstroms) |           |           |
|------------------|------------------|----------------|-------------------------|-----------|-----------|
|                  |                  |                | X                       | Y         | Z         |
| 1                | 8                | 0              | -0.637312               | 0.053520  | 1.961058  |
| 2                | 8                | 0              | -1.904241               | 0.215981  | 1.658360  |
| 3                | 6                | 0              | 8.017756                | 1.608359  | -0.502948 |
| 4                | 6                | 0              | 6.704284                | 1.159821  | -0.618754 |
| 5                | 6                | 0              | 6.316243                | -0.033547 | 0.013086  |
| 6                | 6                | 0              | 7.263339                | -0.779420 | 0.730696  |
| 7                | 6                | 0              | 8.571660                | -0.317463 | 0.851182  |
| 8                | 6                | 0              | 8.952801                | 0.877995  | 0.236267  |
| 9                | 7                | 0              | 5.011679                | -0.556653 | -0.061608 |
| 10               | 6                | 0              | 3.975617                | 0.194657  | -0.218088 |
| 11               | 6                | 0              | 2.647727                | -0.393214 | -0.334252 |
| 12               | 6                | 0              | 1.547083                | 0.415118  | -0.529994 |
| 13               | 6                | 0              | 0.212990                | -0.115062 | -0.670398 |
| 14               | 6                | 0              | 2.472370                | -1.822652 | -0.255963 |
| 15               | 6                | 0              | 1.181603                | -2.372114 | -0.331142 |
| 16               | 6                | 0              | 0.061617                | -1.564829 | -0.466947 |
| 17               | 6                | 0              | -1.252047               | -2.170382 | -0.456844 |
| 18               | 7                | 0              | -2.295297               | -1.505550 | -0.075894 |
| 19               | 6                | 0              | -3.615048               | -2.003906 | -0.046864 |
| 20               | 6                | 0              | -3.954731               | -3.361323 | -0.151254 |
| 21               | 6                | 0              | -4.618315               | -1.035344 | 0.104127  |
| 22               | 6                | 0              | -5.956217               | -1.418421 | 0.129634  |
| 23               | 6                | 0              | -6.299154               | -2.767428 | 0.016218  |
| 24               | 6                | 0              | -5.295888               | -3.733249 | -0.121295 |
| 25               | 1                | 0              | 8.315146                | 2.525830  | -1.000887 |
| 26               | 1                | 0              | 9.295505                | -0.894015 | 1.418243  |
| 27               | 1                | 0              | 9.975258                | 1.231990  | 0.320175  |
| 28               | 1                | 0              | 4.041594                | 1.285449  | -0.256232 |

|    |   |   |           |           |           |
|----|---|---|-----------|-----------|-----------|
| 29 | 1 | 0 | 1.658589  | 1.492047  | -0.609525 |
| 30 | 8 | 0 | -0.752628 | 0.613722  | -1.012034 |
| 31 | 8 | 0 | 3.509732  | -2.635166 | -0.091402 |
| 32 | 1 | 0 | 1.080467  | -3.447646 | -0.227657 |
| 33 | 1 | 0 | -1.332926 | -3.211992 | -0.770387 |
| 34 | 1 | 0 | -3.187967 | -4.123259 | -0.236125 |
| 35 | 1 | 0 | -4.343646 | 0.010442  | 0.181758  |
| 36 | 1 | 0 | -6.725316 | -0.660739 | 0.237732  |
| 37 | 1 | 0 | -7.341264 | -3.069296 | 0.040518  |
| 38 | 1 | 0 | -5.560112 | -4.783013 | -0.197568 |
| 39 | 1 | 0 | 5.993913  | 1.714343  | -1.222758 |
| 40 | 1 | 0 | 6.952253  | -1.707723 | 1.198667  |
| 41 | 1 | 0 | 4.335030  | -2.045817 | -0.036889 |
| 42 | 1 | 0 | -2.101502 | -0.496415 | 0.691331  |
| 43 | 6 | 0 | -4.867128 | 2.492210  | -1.367328 |
| 44 | 6 | 0 | -3.533020 | 2.813448  | -1.103005 |
| 45 | 6 | 0 | -3.078068 | 2.943282  | 0.212097  |
| 46 | 6 | 0 | -3.982792 | 2.735694  | 1.262314  |
| 47 | 6 | 0 | -5.317879 | 2.426173  | 1.002824  |
| 48 | 6 | 0 | -5.766714 | 2.305284  | -0.316403 |
| 49 | 6 | 0 | -1.638942 | 3.327130  | 0.515395  |
| 50 | 8 | 0 | -0.776279 | 3.285390  | -0.605000 |
| 51 | 1 | 0 | -1.272631 | 2.685825  | 1.328908  |
| 52 | 1 | 0 | -1.619998 | 4.359192  | 0.890083  |
| 53 | 1 | 0 | -0.704991 | 2.337713  | -0.856954 |
| 54 | 1 | 0 | -5.204036 | 2.390696  | -2.395093 |
| 55 | 1 | 0 | -2.829096 | 2.965918  | -1.913931 |
| 56 | 1 | 0 | -3.636531 | 2.813981  | 2.289657  |
| 57 | 1 | 0 | -6.006843 | 2.269607  | 1.827800  |
| 58 | 1 | 0 | -6.804631 | 2.059832  | -0.520378 |

-----

IM2(triplet state)

Standard orientation:

| Center<br>Number | Atomic<br>Number | Atomic<br>Type | Coordinates (Angstroms) |           |           |
|------------------|------------------|----------------|-------------------------|-----------|-----------|
|                  |                  |                | X                       | Y         | Z         |
| 1                | 8                | 0              | -2.080515               | 0.748253  | 2.075665  |
| 2                | 8                | 0              | -2.949079               | 0.548228  | 1.090280  |
| 3                | 6                | 0              | 7.788502                | 1.337712  | -0.735268 |
| 4                | 6                | 0              | 6.473152                | 0.881291  | -0.760514 |
| 5                | 6                | 0              | 6.104997                | -0.227391 | 0.020033  |
| 6                | 6                | 0              | 7.072276                | -0.884578 | 0.795060  |

|    |   |   |           |           |           |
|----|---|---|-----------|-----------|-----------|
| 7  | 6 | 0 | 8.382839  | -0.414399 | 0.822850  |
| 8  | 6 | 0 | 8.744712  | 0.698556  | 0.059591  |
| 9  | 7 | 0 | 4.799097  | -0.751514 | 0.048153  |
| 10 | 6 | 0 | 3.755738  | -0.030314 | -0.186146 |
| 11 | 6 | 0 | 2.433508  | -0.639547 | -0.183669 |
| 12 | 6 | 0 | 1.309642  | 0.115321  | -0.437701 |
| 13 | 6 | 0 | -0.019563 | -0.446288 | -0.441795 |
| 14 | 6 | 0 | 2.280313  | -2.045410 | 0.091803  |
| 15 | 6 | 0 | 0.991806  | -2.620477 | 0.100933  |
| 16 | 6 | 0 | -0.148789 | -1.876580 | -0.143678 |
| 17 | 6 | 0 | -1.426933 | -2.577483 | -0.105415 |
| 18 | 7 | 0 | -2.568857 | -1.998375 | -0.212831 |
| 19 | 6 | 0 | -3.743419 | -2.768129 | -0.207446 |
| 20 | 6 | 0 | -3.834755 | -4.042536 | -0.796731 |
| 21 | 6 | 0 | -4.885715 | -2.196179 | 0.378994  |
| 22 | 6 | 0 | -6.082585 | -2.906092 | 0.418362  |
| 23 | 6 | 0 | -6.166571 | -4.178010 | -0.156515 |
| 24 | 6 | 0 | -5.042510 | -4.736807 | -0.770944 |
| 25 | 1 | 0 | 8.070805  | 2.188825  | -1.346781 |
| 26 | 1 | 0 | 9.122954  | -0.920743 | 1.434125  |
| 27 | 1 | 0 | 9.768513  | 1.058279  | 0.072474  |
| 28 | 1 | 0 | 3.812211  | 1.044142  | -0.378189 |
| 29 | 1 | 0 | 1.387329  | 1.179835  | -0.636801 |
| 30 | 8 | 0 | -1.013670 | 0.292196  | -0.712633 |
| 31 | 8 | 0 | 3.325422  | -2.811429 | 0.343180  |
| 32 | 1 | 0 | 0.919795  | -3.682426 | 0.313257  |
| 33 | 1 | 0 | -1.346690 | -3.660727 | 0.051732  |
| 34 | 1 | 0 | -2.973851 | -4.466755 | -1.303324 |
| 35 | 1 | 0 | -4.802377 | -1.205523 | 0.813045  |
| 36 | 1 | 0 | -6.955122 | -2.463030 | 0.888526  |
| 37 | 1 | 0 | -7.104875 | -4.723337 | -0.139386 |
| 38 | 1 | 0 | -5.108524 | -5.714103 | -1.239282 |
| 39 | 1 | 0 | 5.745853  | 1.361887  | -1.406159 |
| 40 | 1 | 0 | 6.776055  | -1.749447 | 1.379676  |
| 41 | 1 | 0 | 4.148971  | -2.204195 | 0.295047  |
| 42 | 1 | 0 | -2.401701 | 0.192535  | 0.327266  |
| 43 | 6 | 0 | -4.020568 | 4.749803  | -1.284970 |
| 44 | 6 | 0 | -2.706637 | 4.302887  | -1.133350 |
| 45 | 6 | 0 | -2.245322 | 3.857733  | 0.110131  |
| 46 | 6 | 0 | -3.125056 | 3.858652  | 1.198966  |
| 47 | 6 | 0 | -4.437086 | 4.310705  | 1.052380  |
| 48 | 6 | 0 | -4.889310 | 4.759333  | -0.191281 |
| 49 | 6 | 0 | -0.806051 | 3.410983  | 0.285733  |
| 50 | 8 | 0 | -0.215964 | 2.928712  | -0.913743 |

|    |   |   |           |          |           |
|----|---|---|-----------|----------|-----------|
| 51 | 1 | 0 | -0.756651 | 2.655393 | 1.081795  |
| 52 | 1 | 0 | -0.197144 | 4.263917 | 0.611515  |
| 53 | 1 | 0 | -0.584374 | 2.030899 | -1.044030 |
| 54 | 1 | 0 | -4.366694 | 5.089917 | -2.256986 |
| 55 | 1 | 0 | -2.027572 | 4.282292 | -1.979306 |
| 56 | 1 | 0 | -2.785662 | 3.480534 | 2.159331  |
| 57 | 1 | 0 | -5.110152 | 4.301360 | 1.904960  |
| 58 | 1 | 0 | -5.912014 | 5.105498 | -0.308245 |

TS2(triplet state)

Standard orientation:

| Center<br>Number | Atomic<br>Number | Atomic<br>Type | Coordinates (Angstroms) |           |           |
|------------------|------------------|----------------|-------------------------|-----------|-----------|
|                  |                  |                | X                       | Y         | Z         |
| 1                | 8                | 0              | 0.707222                | -1.233721 | 1.701722  |
| 2                | 8                | 0              | 1.900538                | -0.517354 | 1.905487  |
| 3                | 6                | 0              | -8.036433               | -1.381090 | -0.604653 |
| 4                | 6                | 0              | -6.713763               | -0.957818 | -0.708382 |
| 5                | 6                | 0              | -6.265225               | 0.125568  | 0.065624  |
| 6                | 6                | 0              | -7.162191               | 0.792035  | 0.913738  |
| 7                | 6                | 0              | -8.480595               | 0.355539  | 1.018991  |
| 8                | 6                | 0              | -8.921410               | -0.733037 | 0.262049  |
| 9                | 7                | 0              | -4.946673               | 0.615913  | 0.015550  |
| 10               | 6                | 0              | -3.942417               | -0.129286 | -0.300024 |
| 11               | 6                | 0              | -2.603925               | 0.438212  | -0.379862 |
| 12               | 6                | 0              | -1.529847               | -0.346567 | -0.744201 |
| 13               | 6                | 0              | -0.195277               | 0.184763  | -0.872253 |
| 14               | 6                | 0              | -2.385605               | 1.831841  | -0.085609 |
| 15               | 6                | 0              | -1.077968               | 2.361511  | -0.121924 |
| 16               | 6                | 0              | 0.011344                | 1.574222  | -0.442482 |
| 17               | 6                | 0              | 1.352271                | 2.137950  | -0.339639 |
| 18               | 7                | 0              | 2.366891                | 1.395882  | -0.061636 |
| 19               | 6                | 0              | 3.676482                | 1.899444  | 0.007708  |
| 20               | 6                | 0              | 4.100705                | 3.100064  | -0.591550 |
| 21               | 6                | 0              | 4.612279                | 1.097335  | 0.683041  |
| 22               | 6                | 0              | 5.938560                | 1.505800  | 0.793124  |
| 23               | 6                | 0              | 6.351608                | 2.708750  | 0.215569  |
| 24               | 6                | 0              | 5.429943                | 3.497758  | -0.481686 |
| 25               | 1                | 0              | -8.380577               | -2.212810 | -1.211200 |
| 26               | 1                | 0              | -9.165538               | 0.869216  | 1.685972  |
| 27               | 1                | 0              | -9.951564               | -1.066386 | 0.335624  |
| 28               | 1                | 0              | -4.044200               | -1.198362 | -0.504274 |



|    |   |   |           |           |           |
|----|---|---|-----------|-----------|-----------|
| 29 | 1 | 0 | -1.668889 | -1.395716 | -0.984481 |
| 30 | 8 | 0 | 0.730926  | -0.499170 | -1.383801 |
| 31 | 8 | 0 | -3.388401 | 2.626096  | 0.251844  |
| 32 | 1 | 0 | -0.946915 | 3.401941  | 0.158314  |
| 33 | 1 | 0 | 1.432097  | 3.224349  | -0.452939 |
| 34 | 1 | 0 | 3.404982  | 3.704329  | -1.163976 |
| 35 | 1 | 0 | 4.286027  | 0.154143  | 1.106871  |
| 36 | 1 | 0 | 6.651149  | 0.877430  | 1.317914  |
| 37 | 1 | 0 | 7.387419  | 3.023946  | 0.291996  |
| 38 | 1 | 0 | 5.752809  | 4.421530  | -0.951698 |
| 39 | 1 | 0 | -6.043632 | -1.444255 | -1.409195 |
| 40 | 1 | 0 | -6.804994 | 1.637718  | 1.492303  |
| 41 | 1 | 0 | -4.231049 | 2.049411  | 0.246797  |
| 42 | 1 | 0 | 1.991124  | 0.037435  | 1.084949  |
| 43 | 6 | 0 | 4.755037  | -1.998275 | -1.314482 |
| 44 | 6 | 0 | 3.407391  | -2.334165 | -1.201197 |
| 45 | 6 | 0 | 2.895100  | -2.827269 | 0.010706  |
| 46 | 6 | 0 | 3.769022  | -2.968065 | 1.105451  |
| 47 | 6 | 0 | 5.115451  | -2.635477 | 0.988524  |
| 48 | 6 | 0 | 5.614795  | -2.145945 | -0.223000 |
| 49 | 6 | 0 | 1.459794  | -3.151905 | 0.186946  |
| 50 | 8 | 0 | 0.630462  | -3.112625 | -0.917574 |
| 51 | 1 | 0 | 1.061087  | -2.218993 | 1.011150  |
| 52 | 1 | 0 | 1.280406  | -4.064142 | 0.764069  |
| 53 | 1 | 0 | 0.647676  | -2.186617 | -1.268178 |
| 54 | 1 | 0 | 5.137421  | -1.622131 | -2.258752 |
| 55 | 1 | 0 | 2.746352  | -2.223299 | -2.052715 |
| 56 | 1 | 0 | 3.380919  | -3.337231 | 2.050747  |
| 57 | 1 | 0 | 5.776767  | -2.752943 | 1.841748  |
| 58 | 1 | 0 | 6.662857  | -1.878313 | -0.313045 |

-----

IM3(singlet state)

Standard orientation:

| Center<br>Number | Atomic<br>Number | Atomic<br>Type | Coordinates (Angstroms) |           |           |
|------------------|------------------|----------------|-------------------------|-----------|-----------|
|                  |                  |                | X                       | Y         | Z         |
| 1                | 8                | 0              | -2.490491               | 0.292499  | 2.452923  |
| 2                | 8                | 0              | -3.540041               | 0.208539  | 1.444559  |
| 3                | 6                | 0              | 7.770864                | 1.548062  | -0.628300 |
| 4                | 6                | 0              | 6.469761                | 1.049427  | -0.626793 |
| 5                | 6                | 0              | 6.196134                | -0.194923 | -0.033250 |
| 6                | 6                | 0              | 7.247764                | -0.938137 | 0.525135  |

|    |   |   |           |           |           |
|----|---|---|-----------|-----------|-----------|
| 7  | 6 | 0 | 8.543781  | -0.428141 | 0.528801  |
| 8  | 6 | 0 | 8.810349  | 0.817520  | -0.046112 |
| 9  | 7 | 0 | 4.911686  | -0.768119 | 0.000611  |
| 10 | 6 | 0 | 3.846502  | -0.037511 | 0.046416  |
| 11 | 6 | 0 | 2.525299  | -0.636100 | 0.030974  |
| 12 | 6 | 0 | 1.390435  | 0.188943  | 0.088650  |
| 13 | 6 | 0 | 0.102633  | -0.335077 | 0.074200  |
| 14 | 6 | 0 | 2.357534  | -2.045042 | -0.035389 |
| 15 | 6 | 0 | 1.064600  | -2.562140 | -0.060801 |
| 16 | 6 | 0 | -0.076229 | -1.741035 | -0.008039 |
| 17 | 6 | 0 | -1.354707 | -2.441050 | -0.100138 |
| 18 | 7 | 0 | -2.538286 | -1.949476 | 0.033974  |
| 19 | 6 | 0 | -3.642563 | -2.804370 | -0.198013 |
| 20 | 6 | 0 | -3.656321 | -3.755392 | -1.232651 |
| 21 | 6 | 0 | -4.779435 | -2.652813 | 0.612766  |
| 22 | 6 | 0 | -5.889801 | -3.471008 | 0.419081  |
| 23 | 6 | 0 | -5.893989 | -4.429808 | -0.598044 |
| 24 | 6 | 0 | -4.777147 | -4.561487 | -1.426336 |
| 25 | 1 | 0 | 7.975484  | 2.506111  | -1.096250 |
| 26 | 1 | 0 | 9.347561  | -1.006051 | 0.974199  |
| 27 | 1 | 0 | 9.822228  | 1.209958  | -0.053368 |
| 28 | 1 | 0 | 3.896930  | 1.054102  | 0.113034  |
| 29 | 1 | 0 | 1.520183  | 1.265792  | 0.134386  |
| 30 | 8 | 0 | -0.986530 | 0.477555  | 0.135815  |
| 31 | 8 | 0 | 3.406754  | -2.888900 | -0.081233 |
| 32 | 1 | 0 | 0.945312  | -3.638538 | -0.129278 |
| 33 | 1 | 0 | -1.243423 | -3.511666 | -0.306726 |
| 34 | 1 | 0 | -2.806093 | -3.836206 | -1.902065 |
| 35 | 1 | 0 | -4.770401 | -1.898299 | 1.391665  |
| 36 | 1 | 0 | -6.757853 | -3.355292 | 1.060934  |
| 37 | 1 | 0 | -6.765494 | -5.057846 | -0.753361 |
| 38 | 1 | 0 | -4.780770 | -5.286649 | -2.234432 |
| 39 | 1 | 0 | 5.675329  | 1.606905  | -1.111953 |
| 40 | 1 | 0 | 7.026175  | -1.905623 | 0.964164  |
| 41 | 1 | 0 | 4.228043  | -2.317140 | -0.053764 |
| 42 | 1 | 0 | -3.152135 | -0.487887 | 0.845458  |
| 43 | 6 | 0 | -4.555182 | 3.333047  | 0.130653  |
| 44 | 6 | 0 | -3.185490 | 3.125208  | 0.027928  |
| 45 | 6 | 0 | -2.345686 | 4.189864  | -0.346860 |
| 46 | 6 | 0 | -2.895238 | 5.455318  | -0.616148 |
| 47 | 6 | 0 | -4.269334 | 5.655729  | -0.518487 |
| 48 | 6 | 0 | -5.098073 | 4.594097  | -0.144347 |
| 49 | 6 | 0 | -0.896050 | 4.035436  | -0.457435 |
| 50 | 8 | 0 | -0.257495 | 2.996485  | -0.284596 |

|    |   |   |           |          |           |
|----|---|---|-----------|----------|-----------|
| 51 | 1 | 0 | -1.740185 | 0.552903 | 1.881950  |
| 52 | 1 | 0 | -0.344901 | 4.955732 | -0.719829 |
| 53 | 1 | 0 | -0.722909 | 1.422040 | -0.017956 |
| 54 | 1 | 0 | -5.195968 | 2.510622 | 0.430258  |
| 55 | 1 | 0 | -2.787335 | 2.143666 | 0.249442  |
| 56 | 1 | 0 | -2.240217 | 6.273936 | -0.900771 |
| 57 | 1 | 0 | -4.693924 | 6.631652 | -0.728731 |
| 58 | 1 | 0 | -6.169464 | 4.749829 | -0.063626 |

-----

COM2(singlet state)

Input orientation:

| Center<br>Number | Atomic<br>Number | Atomic<br>Type | Coordinates (Angstroms) |           |           |
|------------------|------------------|----------------|-------------------------|-----------|-----------|
|                  |                  |                | X                       | Y         | Z         |
| 1                | 8                | 0              | -4.437086               | 1.858126  | 1.284287  |
| 2                | 1                | 0              | -4.841866               | 0.971551  | 1.326843  |
| 3                | 8                | 0              | -5.067310               | 2.373237  | 0.080724  |
| 4                | 1                | 0              | -5.582741               | 3.113171  | 0.442705  |
| 5                | 6                | 0              | 7.674414                | 2.516145  | -0.755636 |
| 6                | 6                | 0              | 6.284064                | 2.454103  | -0.704644 |
| 7                | 6                | 0              | 5.617672                | 1.237177  | -0.924820 |
| 8                | 6                | 0              | 6.370939                | 0.092817  | -1.243604 |
| 9                | 6                | 0              | 7.761536                | 0.166161  | -1.310221 |
| 10               | 6                | 0              | 8.419703                | 1.372597  | -1.058634 |
| 11               | 7                | 0              | 4.212767                | 1.243135  | -0.861425 |
| 12               | 6                | 0              | 3.593978                | 0.221656  | -0.391787 |
| 13               | 6                | 0              | 2.132169                | 0.138775  | -0.353007 |
| 14               | 6                | 0              | 1.321835                | 1.174311  | -0.850786 |
| 15               | 6                | 0              | -0.060784               | 1.065804  | -0.800142 |
| 16               | 6                | 0              | 1.525618                | -1.005986 | 0.196396  |
| 17               | 6                | 0              | 0.143317                | -1.117698 | 0.247366  |
| 18               | 6                | 0              | -0.664045               | -0.081908 | -0.251258 |
| 19               | 6                | 0              | -2.126038               | -0.151808 | -0.222358 |
| 20               | 7                | 0              | -2.764871               | -1.127485 | 0.316339  |
| 21               | 6                | 0              | -4.169237               | -1.113998 | 0.240825  |
| 22               | 6                | 0              | -4.904265               | -1.411085 | 1.402816  |
| 23               | 6                | 0              | -4.858944               | -0.835346 | -0.952079 |
| 24               | 6                | 0              | -6.252948               | -0.830928 | -0.972071 |
| 25               | 6                | 0              | -6.979235               | -1.091595 | 0.191856  |
| 26               | 6                | 0              | -6.299083               | -1.379751 | 1.379384  |
| 27               | 1                | 0              | 8.177669                | 3.459913  | -0.568460 |
| 28               | 1                | 0              | 8.332405                | -0.721045 | -1.567604 |

|    |   |   |           |           |           |
|----|---|---|-----------|-----------|-----------|
| 29 | 1 | 0 | 9.502527  | 1.424941  | -1.112978 |
| 30 | 1 | 0 | 4.131264  | -0.642748 | 0.020647  |
| 31 | 1 | 0 | 1.798533  | 2.053264  | -1.270456 |
| 32 | 1 | 0 | -0.330739 | -1.997485 | 0.668381  |
| 33 | 1 | 0 | -3.637605 | 2.769173  | -1.050253 |
| 34 | 1 | 0 | -4.365253 | -1.641832 | 2.316052  |
| 35 | 1 | 0 | -4.295164 | -0.639755 | -1.858440 |
| 36 | 1 | 0 | -6.773219 | -0.617315 | -1.900805 |
| 37 | 1 | 0 | -8.064123 | -1.079266 | 0.173899  |
| 38 | 1 | 0 | -6.854457 | -1.587774 | 2.288657  |
| 39 | 1 | 0 | 5.692145  | 3.335736  | -0.480317 |
| 40 | 1 | 0 | 5.863248  | -0.839359 | -1.470063 |
| 41 | 8 | 0 | -2.890333 | 2.857732  | -1.672244 |
| 42 | 1 | 0 | -3.158567 | 2.322175  | -2.429767 |
| 43 | 1 | 0 | -2.642001 | 0.701835  | -0.673691 |
| 44 | 1 | 0 | -0.699719 | 1.860924  | -1.175976 |
| 45 | 1 | 0 | 2.150840  | -1.807212 | 0.580417  |

-----

TS3(singlet state with  $\langle S^2 \rangle = 0.7249$ )

Input orientation:

| Center<br>Number | Atomic<br>Number | Atomic<br>Type | Coordinates (Angstroms) |           |           |
|------------------|------------------|----------------|-------------------------|-----------|-----------|
|                  |                  |                | X                       | Y         | Z         |
| 1                | 8                | 0              | -2.712699               | 1.289240  | 0.871502  |
| 2                | 1                | 0              | -3.684919               | 1.318332  | 0.896974  |
| 3                | 8                | 0              | -2.810963               | 3.182322  | 0.787461  |
| 4                | 1                | 0              | -1.842064               | 3.248577  | 0.778704  |
| 5                | 6                | 0              | 7.457038                | 2.331125  | -1.386249 |
| 6                | 6                | 0              | 6.066789                | 2.286790  | -1.316694 |
| 7                | 6                | 0              | 5.400100                | 1.057535  | -1.183876 |
| 8                | 6                | 0              | 6.152484                | -0.130635 | -1.169766 |
| 9                | 6                | 0              | 7.543037                | -0.079879 | -1.257320 |
| 10               | 6                | 0              | 8.201761                | 1.148121  | -1.356843 |
| 11               | 7                | 0              | 3.994956                | 1.080748  | -1.121143 |
| 12               | 6                | 0              | 3.379401                | 0.239159  | -0.373869 |
| 13               | 6                | 0              | 1.916845                | 0.168576  | -0.310082 |
| 14               | 6                | 0              | 1.153346                | 1.049028  | -1.092295 |
| 15               | 6                | 0              | -0.237344               | 1.000329  | -1.053262 |
| 16               | 6                | 0              | 1.260666                | -0.762073 | 0.516252  |
| 17               | 6                | 0              | -0.125600               | -0.807527 | 0.559357  |
| 18               | 6                | 0              | -0.881570               | 0.071999  | -0.227285 |
| 19               | 6                | 0              | -2.371683               | 0.081909  | -0.189722 |

|    |   |   |           |           |           |
|----|---|---|-----------|-----------|-----------|
| 20 | 7 | 0 | -3.000592 | -0.899507 | 0.515059  |
| 21 | 6 | 0 | -4.338176 | -1.129653 | 0.276090  |
| 22 | 6 | 0 | -4.904084 | -2.232606 | 0.962390  |
| 23 | 6 | 0 | -5.174655 | -0.357484 | -0.577845 |
| 24 | 6 | 0 | -6.507794 | -0.708973 | -0.740639 |
| 25 | 6 | 0 | -7.042501 | -1.821311 | -0.077146 |
| 26 | 6 | 0 | -6.233860 | -2.581895 | 0.775116  |
| 27 | 1 | 0 | 7.960642  | 3.289144  | -1.473467 |
| 28 | 1 | 0 | 8.113288  | -1.004056 | -1.255872 |
| 29 | 1 | 0 | 9.284448  | 1.182442  | -1.426276 |
| 30 | 1 | 0 | 3.919316  | -0.468473 | 0.269599  |
| 31 | 1 | 0 | 1.654755  | 1.769285  | -1.732364 |
| 32 | 1 | 0 | -0.641601 | -1.520802 | 1.191718  |
| 33 | 1 | 0 | -3.218567 | 2.870003  | -0.898728 |
| 34 | 1 | 0 | -4.257961 | -2.801244 | 1.622578  |
| 35 | 1 | 0 | -4.791069 | 0.521812  | -1.088851 |
| 36 | 1 | 0 | -7.142125 | -0.111565 | -1.387922 |
| 37 | 1 | 0 | -8.085633 | -2.085711 | -0.217095 |
| 38 | 1 | 0 | -6.647314 | -3.439439 | 1.295999  |
| 39 | 1 | 0 | 5.475556  | 3.196420  | -1.348161 |
| 40 | 1 | 0 | 5.643905  | -1.088384 | -1.123700 |
| 41 | 8 | 0 | -3.423709 | 2.510021  | -1.795594 |
| 42 | 1 | 0 | -4.166244 | 3.038349  | -2.113474 |
| 43 | 1 | 0 | -2.809078 | 0.451282  | -1.117722 |
| 44 | 1 | 0 | -0.833221 | 1.681785  | -1.653863 |
| 45 | 1 | 0 | 1.859634  | -1.439270 | 1.115016  |

-----  
**TAE-DaOH system**

Summarized energy of all species of TAE-DaOH system in Figure 3

| species                                           | ZPG(a.u.) | ZPG-corrected<br>Gibbs energy (a.u.) | $\Delta G$ (kJ/mol) |
|---------------------------------------------------|-----------|--------------------------------------|---------------------|
| TAE-DaOH                                          | 0.265292  | -1031.558635                         |                     |
| PhCH <sub>2</sub> OH                              | 0.102128  | -346.709719                          |                     |
| O <sub>2</sub>                                    | -0.016201 | -150.33335                           |                     |
| TAE-DaOH+<br>PhCH <sub>2</sub> OH+ O <sub>2</sub> | 0.351219  | -1528.601704                         | -6.1                |
| IM1                                               | 0.385281  | -1528.599384                         | 0                   |
| TS1                                               | 0.381904  | 1528.551321                          | 125.9               |
| IM2                                               | 0.382927  | -1528.552011                         | 124.3               |
| TS2                                               | 0.383422  | -1528.533138                         | 173.8               |
| IM3                                               |           | -1528.617036                         | -46.3               |
|                                                   |           |                                      |                     |
| PhCHO                                             | 0.079619  | -345.526192                          |                     |

|                               |          |              |       |
|-------------------------------|----------|--------------|-------|
| H <sub>2</sub> O <sub>2</sub> | 0.0041   | -151.544838  |       |
| TAE-DaOH+ PhCHO+              |          |              |       |
| O <sub>2</sub>                | 0.349011 | -1528.629665 | -79.4 |

Summarized energy of all species of TAE-DaOH system in Figure 4

| species                                     | ZPG       | ZPG-corrected<br>Gibbs nergy(a.u) | $\Delta G$ (kJ/mol) |
|---------------------------------------------|-----------|-----------------------------------|---------------------|
| TAE-DaOH                                    | 0.265292  | -1031.558635                      |                     |
| H <sub>2</sub> O                            | 0.003015  | -76.422682                        |                     |
| O <sub>2</sub>                              | -0.016201 | -150.33335                        |                     |
| TAE-DaOH+ H <sub>2</sub> O + O <sub>2</sub> | 0.272407  | -1259.526155                      | -23.1               |
| COM2                                        | 0.306604  | -1259.517352                      | 0.0                 |
| TS3                                         | 0.309368  | -1259.453119                      | 168.5               |
| Product +2H <sub>2</sub> O                  | 0.274951  | -1259.636619                      | -313.1              |

### Optimized structures of TAE-DaOH system

TAE-DaOH

Standard orientation:

| Center<br>Number | Atomic<br>Number | Atomic<br>Type | Coordinates (Angstroms) |           |           |
|------------------|------------------|----------------|-------------------------|-----------|-----------|
|                  |                  |                | X                       | Y         | Z         |
| 1                | 6                | 0              | -6.972374               | 1.212812  | 0.694549  |
| 2                | 6                | 0              | -5.594660               | 1.004362  | 0.677342  |
| 3                | 6                | 0              | -5.062185               | -0.114117 | 0.013279  |
| 4                | 6                | 0              | -5.931848               | -1.029094 | -0.600497 |
| 5                | 6                | 0              | -7.306912               | -0.808184 | -0.587801 |
| 6                | 6                | 0              | -7.832743               | 0.314280  | 0.057922  |
| 7                | 7                | 0              | -3.684846               | -0.396338 | -0.039045 |
| 8                | 6                | 0              | -2.802504               | 0.548213  | -0.040650 |
| 9                | 6                | 0              | -1.381454               | 0.255034  | -0.042865 |
| 10               | 6                | 0              | -0.462895               | 1.317295  | -0.045100 |
| 11               | 6                | 0              | 0.909895                | 1.089491  | -0.044015 |
| 12               | 6                | 0              | -0.909779               | -1.089495 | -0.045067 |
| 13               | 6                | 0              | 0.463011                | -1.317311 | -0.046104 |
| 14               | 6                | 0              | 1.381576                | -0.255048 | -0.042724 |
| 15               | 6                | 0              | 2.802651                | -0.548120 | -0.040977 |
| 16               | 7                | 0              | 3.684834                | 0.396591  | -0.039878 |
| 17               | 6                | 0              | 5.062170                | 0.114433  | 0.012667  |
| 18               | 6                | 0              | 5.594240                | -1.002640 | 0.679291  |
| 19               | 6                | 0              | 5.932156                | 1.027713  | -0.603189 |

|    |   |   |           |           |           |
|----|---|---|-----------|-----------|-----------|
| 20 | 6 | 0 | 7.307143  | 0.806294  | -0.589911 |
| 21 | 6 | 0 | 7.832638  | -0.314729 | 0.058582  |
| 22 | 6 | 0 | 6.971881  | -1.211501 | 0.697213  |
| 23 | 1 | 0 | -7.376014 | 2.074675  | 1.217037  |
| 24 | 1 | 0 | -7.969492 | -1.516036 | -1.076088 |
| 25 | 1 | 0 | -8.905139 | 0.480346  | 0.077195  |
| 26 | 1 | 0 | -3.090202 | 1.604571  | -0.054981 |
| 27 | 1 | 0 | -0.822956 | 2.341352  | -0.044953 |
| 28 | 8 | 0 | -1.755091 | -2.141508 | -0.048787 |
| 29 | 1 | 0 | 0.823068  | -2.341372 | -0.047316 |
| 30 | 1 | 0 | 3.090618  | -1.604441 | -0.055142 |
| 31 | 1 | 0 | 4.935534  | -1.684648 | 1.206819  |
| 32 | 1 | 0 | 5.510287  | 1.895951  | -1.099262 |
| 33 | 1 | 0 | 7.969936  | 1.512773  | -1.079906 |
| 34 | 1 | 0 | 8.904981  | -0.481008 | 0.078443  |
| 35 | 1 | 0 | 7.375105  | -2.072297 | 1.221782  |
| 36 | 1 | 0 | -4.936416 | 1.687694  | 1.203790  |
| 37 | 1 | 0 | -5.509517 | -1.898293 | -1.094462 |
| 38 | 1 | 0 | -2.679435 | -1.759633 | -0.053909 |
| 39 | 8 | 0 | 1.755112  | 2.141584  | -0.046889 |
| 40 | 1 | 0 | 2.679505  | 1.759867  | -0.052841 |

-----

COM1(triplet state)

Standard orientation:

| Center<br>Number | Atomic<br>Number | Atomic<br>Type | Coordinates (Angstroms) |           |           |
|------------------|------------------|----------------|-------------------------|-----------|-----------|
|                  |                  |                | X                       | Y         | Z         |
| 1                | 8                | 0              | -2.510854               | 2.231618  | -0.302630 |
| 2                | 8                | 0              | -2.980594               | 2.159364  | -1.420591 |
| 3                | 6                | 0              | -7.422815               | -1.245653 | 1.127077  |
| 4                | 6                | 0              | -6.059809               | -1.361106 | 0.860174  |
| 5                | 6                | 0              | -5.482709               | -0.608689 | -0.176550 |
| 6                | 6                | 0              | -6.293493               | 0.233088  | -0.953583 |
| 7                | 6                | 0              | -7.652472               | 0.351463  | -0.672733 |
| 8                | 6                | 0              | -8.222383               | -0.386421 | 0.368730  |
| 9                | 7                | 0              | -4.117359               | -0.677597 | -0.506761 |
| 10               | 6                | 0              | -3.215324               | -0.863878 | 0.399287  |
| 11               | 6                | 0              | -1.809697               | -0.950853 | 0.054069  |
| 12               | 6                | 0              | -0.860095               | -1.125422 | 1.074821  |
| 13               | 6                | 0              | 0.496383                | -1.184081 | 0.790002  |
| 14               | 6                | 0              | -1.378022               | -0.835428 | -1.298314 |
| 15               | 6                | 0              | -0.015235               | -0.902430 | -1.578408 |

|    |   |   |           |           |           |
|----|---|---|-----------|-----------|-----------|
| 16 | 6 | 0 | 0.931028  | -1.068456 | -0.558186 |
| 17 | 6 | 0 | 2.344424  | -1.074981 | -0.888530 |
| 18 | 7 | 0 | 3.236825  | -1.213962 | 0.034585  |
| 19 | 6 | 0 | 4.616655  | -1.165873 | -0.226275 |
| 20 | 6 | 0 | 5.180013  | -0.582926 | -1.374855 |
| 21 | 6 | 0 | 5.462385  | -1.703966 | 0.755613  |
| 22 | 6 | 0 | 6.844673  | -1.686922 | 0.583093  |
| 23 | 6 | 0 | 7.400164  | -1.117210 | -0.564922 |
| 24 | 6 | 0 | 6.562389  | -0.563026 | -1.537912 |
| 25 | 1 | 0 | -7.863591 | -1.836849 | 1.923891  |
| 26 | 1 | 0 | -8.268998 | 1.015290  | -1.270841 |
| 27 | 1 | 0 | -9.283749 | -0.302503 | 0.579520  |
| 28 | 1 | 0 | -3.472135 | -0.935112 | 1.461229  |
| 29 | 1 | 0 | -1.184971 | -1.197248 | 2.107972  |
| 30 | 8 | 0 | 1.385607  | -1.314972 | 1.810226  |
| 31 | 8 | 0 | -2.249754 | -0.650812 | -2.308989 |
| 32 | 1 | 0 | 0.312737  | -0.800549 | -2.607874 |
| 33 | 1 | 0 | 2.606014  | -0.961357 | -1.943715 |
| 34 | 1 | 0 | 4.545235  | -0.115108 | -2.117817 |
| 35 | 1 | 0 | 5.015853  | -2.137524 | 1.644754  |
| 36 | 1 | 0 | 7.487790  | -2.112229 | 1.347167  |
| 37 | 1 | 0 | 8.477241  | -1.093889 | -0.696711 |
| 38 | 1 | 0 | 6.989099  | -0.101848 | -2.423273 |
| 39 | 1 | 0 | -5.449966 | -2.053710 | 1.431192  |
| 40 | 1 | 0 | -5.835532 | 0.799838  | -1.757809 |
| 41 | 1 | 0 | -3.160213 | -0.609610 | -1.893704 |
| 42 | 1 | 0 | 2.301005  | -1.311094 | 1.379422  |
| 43 | 6 | 0 | 3.850036  | 2.136206  | 0.345834  |
| 44 | 6 | 0 | 2.908406  | 1.982384  | 1.362547  |
| 45 | 6 | 0 | 1.538145  | 2.040986  | 1.079879  |
| 46 | 6 | 0 | 1.127566  | 2.236776  | -0.242321 |
| 47 | 6 | 0 | 2.067489  | 2.386824  | -1.263541 |
| 48 | 6 | 0 | 3.432173  | 2.343139  | -0.970909 |
| 49 | 6 | 0 | 0.515565  | 1.912457  | 2.192559  |
| 50 | 8 | 0 | 0.932569  | 1.076982  | 3.261481  |
| 51 | 1 | 0 | -0.438338 | 1.573350  | 1.763017  |
| 52 | 1 | 0 | 0.330911  | 2.899326  | 2.636108  |
| 53 | 1 | 0 | 1.145908  | 0.207188  | 2.874126  |
| 54 | 1 | 0 | 4.909555  | 2.078780  | 0.575529  |
| 55 | 1 | 0 | 3.225175  | 1.804004  | 2.385083  |
| 56 | 1 | 0 | 0.067329  | 2.252314  | -0.477030 |
| 57 | 1 | 0 | 1.733820  | 2.528405  | -2.287342 |
| 58 | 1 | 0 | 4.165111  | 2.457603  | -1.763526 |



TS1(triplet state)

Standard orientation:

| Center<br>Number | Atomic<br>Number | Atomic<br>Type | Coordinates (Angstroms) |           |           |
|------------------|------------------|----------------|-------------------------|-----------|-----------|
|                  |                  |                | X                       | Y         | Z         |
| 1                | 8                | 0              | -0.637312               | 0.053520  | 1.961058  |
| 2                | 8                | 0              | -1.904241               | 0.215981  | 1.658360  |
| 3                | 6                | 0              | 8.017756                | 1.608359  | -0.502948 |
| 4                | 6                | 0              | 6.704284                | 1.159821  | -0.618754 |
| 5                | 6                | 0              | 6.316243                | -0.033547 | 0.013086  |
| 6                | 6                | 0              | 7.263339                | -0.779420 | 0.730696  |
| 7                | 6                | 0              | 8.571660                | -0.317463 | 0.851182  |
| 8                | 6                | 0              | 8.952801                | 0.877995  | 0.236267  |
| 9                | 7                | 0              | 5.011679                | -0.556653 | -0.061608 |
| 10               | 6                | 0              | 3.975617                | 0.194657  | -0.218088 |
| 11               | 6                | 0              | 2.647727                | -0.393214 | -0.334252 |
| 12               | 6                | 0              | 1.547083                | 0.415118  | -0.529994 |
| 13               | 6                | 0              | 0.212990                | -0.115062 | -0.670398 |
| 14               | 6                | 0              | 2.472370                | -1.822652 | -0.255963 |
| 15               | 6                | 0              | 1.181603                | -2.372114 | -0.331142 |
| 16               | 6                | 0              | 0.061617                | -1.564829 | -0.466947 |
| 17               | 6                | 0              | -1.252047               | -2.170382 | -0.456844 |
| 18               | 7                | 0              | -2.295297               | -1.505550 | -0.075894 |
| 19               | 6                | 0              | -3.615048               | -2.003906 | -0.046864 |
| 20               | 6                | 0              | -3.954731               | -3.361323 | -0.151254 |
| 21               | 6                | 0              | -4.618315               | -1.035344 | 0.104127  |
| 22               | 6                | 0              | -5.956217               | -1.418421 | 0.129634  |
| 23               | 6                | 0              | -6.299154               | -2.767428 | 0.016218  |
| 24               | 6                | 0              | -5.295888               | -3.733249 | -0.121295 |
| 25               | 1                | 0              | 8.315146                | 2.525830  | -1.000887 |
| 26               | 1                | 0              | 9.295505                | -0.894015 | 1.418243  |
| 27               | 1                | 0              | 9.975258                | 1.231990  | 0.320175  |
| 28               | 1                | 0              | 4.041594                | 1.285449  | -0.256232 |
| 29               | 1                | 0              | 1.658589                | 1.492047  | -0.609525 |
| 30               | 8                | 0              | -0.752628               | 0.613722  | -1.012034 |
| 31               | 8                | 0              | 3.509732                | -2.635166 | -0.091402 |
| 32               | 1                | 0              | 1.080467                | -3.447646 | -0.227657 |
| 33               | 1                | 0              | -1.332926               | -3.211992 | -0.770387 |
| 34               | 1                | 0              | -3.187967               | -4.123259 | -0.236125 |
| 35               | 1                | 0              | -4.343646               | 0.010442  | 0.181758  |
| 36               | 1                | 0              | -6.725316               | -0.660739 | 0.237732  |
| 37               | 1                | 0              | -7.341264               | -3.069296 | 0.040518  |
| 38               | 1                | 0              | -5.560112               | -4.783013 | -0.197568 |

|    |   |   |           |           |           |
|----|---|---|-----------|-----------|-----------|
| 39 | 1 | 0 | 5.993913  | 1.714343  | -1.222758 |
| 40 | 1 | 0 | 6.952253  | -1.707723 | 1.198667  |
| 41 | 1 | 0 | 4.335030  | -2.045817 | -0.036889 |
| 42 | 1 | 0 | -2.101502 | -0.496415 | 0.691331  |
| 43 | 6 | 0 | -4.867128 | 2.492210  | -1.367328 |
| 44 | 6 | 0 | -3.533020 | 2.813448  | -1.103005 |
| 45 | 6 | 0 | -3.078068 | 2.943282  | 0.212097  |
| 46 | 6 | 0 | -3.982792 | 2.735694  | 1.262314  |
| 47 | 6 | 0 | -5.317879 | 2.426173  | 1.002824  |
| 48 | 6 | 0 | -5.766714 | 2.305284  | -0.316403 |
| 49 | 6 | 0 | -1.638942 | 3.327130  | 0.515395  |
| 50 | 8 | 0 | -0.776279 | 3.285390  | -0.605000 |
| 51 | 1 | 0 | -1.272631 | 2.685825  | 1.328908  |
| 52 | 1 | 0 | -1.619998 | 4.359192  | 0.890083  |
| 53 | 1 | 0 | -0.704991 | 2.337713  | -0.856954 |
| 54 | 1 | 0 | -5.204036 | 2.390696  | -2.395093 |
| 55 | 1 | 0 | -2.829096 | 2.965918  | -1.913931 |
| 56 | 1 | 0 | -3.636531 | 2.813981  | 2.289657  |
| 57 | 1 | 0 | -6.006843 | 2.269607  | 1.827800  |
| 58 | 1 | 0 | -6.804631 | 2.059832  | -0.520378 |

-----  
IM2(triplet state)

Standard orientation:

| Center<br>Number | Atomic<br>Number | Atomic<br>Type | Coordinates (Angstroms) |           |           |
|------------------|------------------|----------------|-------------------------|-----------|-----------|
|                  |                  |                | X                       | Y         | Z         |
| 1                | 8                | 0              | -2.080515               | 0.748253  | 2.075665  |
| 2                | 8                | 0              | -2.949079               | 0.548228  | 1.090280  |
| 3                | 6                | 0              | 7.788502                | 1.337712  | -0.735268 |
| 4                | 6                | 0              | 6.473152                | 0.881291  | -0.760514 |
| 5                | 6                | 0              | 6.104997                | -0.227391 | 0.020033  |
| 6                | 6                | 0              | 7.072276                | -0.884578 | 0.795060  |
| 7                | 6                | 0              | 8.382839                | -0.414399 | 0.822850  |
| 8                | 6                | 0              | 8.744712                | 0.698556  | 0.059591  |
| 9                | 7                | 0              | 4.799097                | -0.751514 | 0.048153  |
| 10               | 6                | 0              | 3.755738                | -0.030314 | -0.186146 |
| 11               | 6                | 0              | 2.433508                | -0.639547 | -0.183669 |
| 12               | 6                | 0              | 1.309642                | 0.115321  | -0.437701 |
| 13               | 6                | 0              | -0.019563               | -0.446288 | -0.441795 |
| 14               | 6                | 0              | 2.280313                | -2.045410 | 0.091803  |
| 15               | 6                | 0              | 0.991806                | -2.620477 | 0.100933  |
| 16               | 6                | 0              | -0.148789               | -1.876580 | -0.143678 |
| 17               | 6                | 0              | -1.426933               | -2.577483 | -0.105415 |

|    |   |   |           |           |           |
|----|---|---|-----------|-----------|-----------|
| 18 | 7 | 0 | -2.568857 | -1.998375 | -0.212831 |
| 19 | 6 | 0 | -3.743419 | -2.768129 | -0.207446 |
| 20 | 6 | 0 | -3.834755 | -4.042536 | -0.796731 |
| 21 | 6 | 0 | -4.885715 | -2.196179 | 0.378994  |
| 22 | 6 | 0 | -6.082585 | -2.906092 | 0.418362  |
| 23 | 6 | 0 | -6.166571 | -4.178010 | -0.156515 |
| 24 | 6 | 0 | -5.042510 | -4.736807 | -0.770944 |
| 25 | 1 | 0 | 8.070805  | 2.188825  | -1.346781 |
| 26 | 1 | 0 | 9.122954  | -0.920743 | 1.434125  |
| 27 | 1 | 0 | 9.768513  | 1.058279  | 0.072474  |
| 28 | 1 | 0 | 3.812211  | 1.044142  | -0.378189 |
| 29 | 1 | 0 | 1.387329  | 1.179835  | -0.636801 |
| 30 | 8 | 0 | -1.013670 | 0.292196  | -0.712633 |
| 31 | 8 | 0 | 3.325422  | -2.811429 | 0.343180  |
| 32 | 1 | 0 | 0.919795  | -3.682426 | 0.313257  |
| 33 | 1 | 0 | -1.346690 | -3.660727 | 0.051732  |
| 34 | 1 | 0 | -2.973851 | -4.466755 | -1.303324 |
| 35 | 1 | 0 | -4.802377 | -1.205523 | 0.813045  |
| 36 | 1 | 0 | -6.955122 | -2.463030 | 0.888526  |
| 37 | 1 | 0 | -7.104875 | -4.723337 | -0.139386 |
| 38 | 1 | 0 | -5.108524 | -5.714103 | -1.239282 |
| 39 | 1 | 0 | 5.745853  | 1.361887  | -1.406159 |
| 40 | 1 | 0 | 6.776055  | -1.749447 | 1.379676  |
| 41 | 1 | 0 | 4.148971  | -2.204195 | 0.295047  |
| 42 | 1 | 0 | -2.401701 | 0.192535  | 0.327266  |
| 43 | 6 | 0 | -4.020568 | 4.749803  | -1.284970 |
| 44 | 6 | 0 | -2.706637 | 4.302887  | -1.133350 |
| 45 | 6 | 0 | -2.245322 | 3.857733  | 0.110131  |
| 46 | 6 | 0 | -3.125056 | 3.858652  | 1.198966  |
| 47 | 6 | 0 | -4.437086 | 4.310705  | 1.052380  |
| 48 | 6 | 0 | -4.889310 | 4.759333  | -0.191281 |
| 49 | 6 | 0 | -0.806051 | 3.410983  | 0.285733  |
| 50 | 8 | 0 | -0.215964 | 2.928712  | -0.913743 |
| 51 | 1 | 0 | -0.756651 | 2.655393  | 1.081795  |
| 52 | 1 | 0 | -0.197144 | 4.263917  | 0.611515  |
| 53 | 1 | 0 | -0.584374 | 2.030899  | -1.044030 |
| 54 | 1 | 0 | -4.366694 | 5.089917  | -2.256986 |
| 55 | 1 | 0 | -2.027572 | 4.282292  | -1.979306 |
| 56 | 1 | 0 | -2.785662 | 3.480534  | 2.159331  |
| 57 | 1 | 0 | -5.110152 | 4.301360  | 1.904960  |
| 58 | 1 | 0 | -5.912014 | 5.105498  | -0.308245 |

-----  
TS2(triplet state)

Standard orientation:

| Center<br>Number | Atomic<br>Number | Atomic<br>Type | Coordinates (Angstroms) |           |           |
|------------------|------------------|----------------|-------------------------|-----------|-----------|
|                  |                  |                | X                       | Y         | Z         |
| 1                | 8                | 0              | 0.707222                | -1.233721 | 1.701722  |
| 2                | 8                | 0              | 1.900538                | -0.517354 | 1.905487  |
| 3                | 6                | 0              | -8.036433               | -1.381090 | -0.604653 |
| 4                | 6                | 0              | -6.713763               | -0.957818 | -0.708382 |
| 5                | 6                | 0              | -6.265225               | 0.125568  | 0.065624  |
| 6                | 6                | 0              | -7.162191               | 0.792035  | 0.913738  |
| 7                | 6                | 0              | -8.480595               | 0.355539  | 1.018991  |
| 8                | 6                | 0              | -8.921410               | -0.733037 | 0.262049  |
| 9                | 7                | 0              | -4.946673               | 0.615913  | 0.015550  |
| 10               | 6                | 0              | -3.942417               | -0.129286 | -0.300024 |
| 11               | 6                | 0              | -2.603925               | 0.438212  | -0.379862 |
| 12               | 6                | 0              | -1.529847               | -0.346567 | -0.744201 |
| 13               | 6                | 0              | -0.195277               | 0.184763  | -0.872253 |
| 14               | 6                | 0              | -2.385605               | 1.831841  | -0.085609 |
| 15               | 6                | 0              | -1.077968               | 2.361511  | -0.121924 |
| 16               | 6                | 0              | 0.011344                | 1.574222  | -0.442482 |
| 17               | 6                | 0              | 1.352271                | 2.137950  | -0.339639 |
| 18               | 7                | 0              | 2.366891                | 1.395882  | -0.061636 |
| 19               | 6                | 0              | 3.676482                | 1.899444  | 0.007708  |
| 20               | 6                | 0              | 4.100705                | 3.100064  | -0.591550 |
| 21               | 6                | 0              | 4.612279                | 1.097335  | 0.683041  |
| 22               | 6                | 0              | 5.938560                | 1.505800  | 0.793124  |
| 23               | 6                | 0              | 6.351608                | 2.708750  | 0.215569  |
| 24               | 6                | 0              | 5.429943                | 3.497758  | -0.481686 |
| 25               | 1                | 0              | -8.380577               | -2.212810 | -1.211200 |
| 26               | 1                | 0              | -9.165538               | 0.869216  | 1.685972  |
| 27               | 1                | 0              | -9.951564               | -1.066386 | 0.335624  |
| 28               | 1                | 0              | -4.044200               | -1.198362 | -0.504274 |
| 29               | 1                | 0              | -1.668889               | -1.395716 | -0.984481 |
| 30               | 8                | 0              | 0.730926                | -0.499170 | -1.383801 |
| 31               | 8                | 0              | -3.388401               | 2.626096  | 0.251844  |
| 32               | 1                | 0              | -0.946915               | 3.401941  | 0.158314  |
| 33               | 1                | 0              | 1.432097                | 3.224349  | -0.452939 |
| 34               | 1                | 0              | 3.404982                | 3.704329  | -1.163976 |
| 35               | 1                | 0              | 4.286027                | 0.154143  | 1.106871  |
| 36               | 1                | 0              | 6.651149                | 0.877430  | 1.317914  |
| 37               | 1                | 0              | 7.387419                | 3.023946  | 0.291996  |
| 38               | 1                | 0              | 5.752809                | 4.421530  | -0.951698 |
| 39               | 1                | 0              | -6.043632               | -1.444255 | -1.409195 |
| 40               | 1                | 0              | -6.804994               | 1.637718  | 1.492303  |

|    |   |   |           |           |           |
|----|---|---|-----------|-----------|-----------|
| 41 | 1 | 0 | -4.231049 | 2.049411  | 0.246797  |
| 42 | 1 | 0 | 1.991124  | 0.037435  | 1.084949  |
| 43 | 6 | 0 | 4.755037  | -1.998275 | -1.314482 |
| 44 | 6 | 0 | 3.407391  | -2.334165 | -1.201197 |
| 45 | 6 | 0 | 2.895100  | -2.827269 | 0.010706  |
| 46 | 6 | 0 | 3.769022  | -2.968065 | 1.105451  |
| 47 | 6 | 0 | 5.115451  | -2.635477 | 0.988524  |
| 48 | 6 | 0 | 5.614795  | -2.145945 | -0.223000 |
| 49 | 6 | 0 | 1.459794  | -3.151905 | 0.186946  |
| 50 | 8 | 0 | 0.630462  | -3.112625 | -0.917574 |
| 51 | 1 | 0 | 1.061087  | -2.218993 | 1.011150  |
| 52 | 1 | 0 | 1.280406  | -4.064142 | 0.764069  |
| 53 | 1 | 0 | 0.647676  | -2.186617 | -1.268178 |
| 54 | 1 | 0 | 5.137421  | -1.622131 | -2.258752 |
| 55 | 1 | 0 | 2.746352  | -2.223299 | -2.052715 |
| 56 | 1 | 0 | 3.380919  | -3.337231 | 2.050747  |
| 57 | 1 | 0 | 5.776767  | -2.752943 | 1.841748  |
| 58 | 1 | 0 | 6.662857  | -1.878313 | -0.313045 |

-----  
IM3(singlet state)

Standard orientation:

| Center<br>Number | Atomic<br>Number | Atomic<br>Type | Coordinates (Angstroms) |           |           |
|------------------|------------------|----------------|-------------------------|-----------|-----------|
|                  |                  |                | X                       | Y         | Z         |
| 1                | 8                | 0              | -2.490491               | 0.292499  | 2.452923  |
| 2                | 8                | 0              | -3.540041               | 0.208539  | 1.444559  |
| 3                | 6                | 0              | 7.770864                | 1.548062  | -0.628300 |
| 4                | 6                | 0              | 6.469761                | 1.049427  | -0.626793 |
| 5                | 6                | 0              | 6.196134                | -0.194923 | -0.033250 |
| 6                | 6                | 0              | 7.247764                | -0.938137 | 0.525135  |
| 7                | 6                | 0              | 8.543781                | -0.428141 | 0.528801  |
| 8                | 6                | 0              | 8.810349                | 0.817520  | -0.046112 |
| 9                | 7                | 0              | 4.911686                | -0.768119 | 0.000611  |
| 10               | 6                | 0              | 3.846502                | -0.037511 | 0.046416  |
| 11               | 6                | 0              | 2.525299                | -0.636100 | 0.030974  |
| 12               | 6                | 0              | 1.390435                | 0.188943  | 0.088650  |
| 13               | 6                | 0              | 0.102633                | -0.335077 | 0.074200  |
| 14               | 6                | 0              | 2.357534                | -2.045042 | -0.035389 |
| 15               | 6                | 0              | 1.064600                | -2.562140 | -0.060801 |
| 16               | 6                | 0              | -0.076229               | -1.741035 | -0.008039 |
| 17               | 6                | 0              | -1.354707               | -2.441050 | -0.100138 |
| 18               | 7                | 0              | -2.538286               | -1.949476 | 0.033974  |
| 19               | 6                | 0              | -3.642563               | -2.804370 | -0.198013 |

|    |   |   |           |           |           |
|----|---|---|-----------|-----------|-----------|
| 20 | 6 | 0 | -3.656321 | -3.755392 | -1.232651 |
| 21 | 6 | 0 | -4.779435 | -2.652813 | 0.612766  |
| 22 | 6 | 0 | -5.889801 | -3.471008 | 0.419081  |
| 23 | 6 | 0 | -5.893989 | -4.429808 | -0.598044 |
| 24 | 6 | 0 | -4.777147 | -4.561487 | -1.426336 |
| 25 | 1 | 0 | 7.975484  | 2.506111  | -1.096250 |
| 26 | 1 | 0 | 9.347561  | -1.006051 | 0.974199  |
| 27 | 1 | 0 | 9.822228  | 1.209958  | -0.053368 |
| 28 | 1 | 0 | 3.896930  | 1.054102  | 0.113034  |
| 29 | 1 | 0 | 1.520183  | 1.265792  | 0.134386  |
| 30 | 8 | 0 | -0.986530 | 0.477555  | 0.135815  |
| 31 | 8 | 0 | 3.406754  | -2.888900 | -0.081233 |
| 32 | 1 | 0 | 0.945312  | -3.638538 | -0.129278 |
| 33 | 1 | 0 | -1.243423 | -3.511666 | -0.306726 |
| 34 | 1 | 0 | -2.806093 | -3.836206 | -1.902065 |
| 35 | 1 | 0 | -4.770401 | -1.898299 | 1.391665  |
| 36 | 1 | 0 | -6.757853 | -3.355292 | 1.060934  |
| 37 | 1 | 0 | -6.765494 | -5.057846 | -0.753361 |
| 38 | 1 | 0 | -4.780770 | -5.286649 | -2.234432 |
| 39 | 1 | 0 | 5.675329  | 1.606905  | -1.111953 |
| 40 | 1 | 0 | 7.026175  | -1.905623 | 0.964164  |
| 41 | 1 | 0 | 4.228043  | -2.317140 | -0.053764 |
| 42 | 1 | 0 | -3.152135 | -0.487887 | 0.845458  |
| 43 | 6 | 0 | -4.555182 | 3.333047  | 0.130653  |
| 44 | 6 | 0 | -3.185490 | 3.125208  | 0.027928  |
| 45 | 6 | 0 | -2.345686 | 4.189864  | -0.346860 |
| 46 | 6 | 0 | -2.895238 | 5.455318  | -0.616148 |
| 47 | 6 | 0 | -4.269334 | 5.655729  | -0.518487 |
| 48 | 6 | 0 | -5.098073 | 4.594097  | -0.144347 |
| 49 | 6 | 0 | -0.896050 | 4.035436  | -0.457435 |
| 50 | 8 | 0 | -0.257495 | 2.996485  | -0.284596 |
| 51 | 1 | 0 | -1.740185 | 0.552903  | 1.881950  |
| 52 | 1 | 0 | -0.344901 | 4.955732  | -0.719829 |
| 53 | 1 | 0 | -0.722909 | 1.422040  | -0.017956 |
| 54 | 1 | 0 | -5.195968 | 2.510622  | 0.430258  |
| 55 | 1 | 0 | -2.787335 | 2.143666  | 0.249442  |
| 56 | 1 | 0 | -2.240217 | 6.273936  | -0.900771 |
| 57 | 1 | 0 | -4.693924 | 6.631652  | -0.728731 |
| 58 | 1 | 0 | -6.169464 | 4.749829  | -0.063626 |

-----  
COM2(singlet state)

Input orientation:

-----  
Center      Atomic      Atomic      Coordinates (Angstroms)

| Number | Number | Type | X         | Y         | Z         |
|--------|--------|------|-----------|-----------|-----------|
| 1      | 8      | 0    | -4.622770 | 2.230584  | 1.189660  |
| 2      | 1      | 0    | -5.073367 | 1.387546  | 0.992278  |
| 3      | 8      | 0    | -5.017176 | 2.992634  | 0.016109  |
| 4      | 1      | 0    | -5.517802 | 3.718246  | 0.424418  |
| 5      | 6      | 0    | 7.689681  | 2.328822  | -0.924842 |
| 6      | 6      | 0    | 6.305535  | 2.276281  | -0.779266 |
| 7      | 6      | 0    | 5.603955  | 1.102444  | -1.096080 |
| 8      | 6      | 0    | 6.306533  | -0.004903 | -1.601852 |
| 9      | 6      | 0    | 7.690235  | 0.059018  | -1.754332 |
| 10     | 6      | 0    | 8.388088  | 1.220065  | -1.411018 |
| 11     | 7      | 0    | 4.207836  | 1.116999  | -0.923270 |
| 12     | 6      | 0    | 3.552985  | 0.040782  | -0.633142 |
| 13     | 6      | 0    | 2.107930  | 0.045316  | -0.504822 |
| 14     | 6      | 0    | 1.356935  | 1.241138  | -0.693316 |
| 15     | 6      | 0    | -0.027754 | 1.195427  | -0.558764 |
| 16     | 6      | 0    | 1.446143  | -1.152928 | -0.186670 |
| 17     | 6      | 0    | 0.062314  | -1.202402 | -0.054727 |
| 18     | 6      | 0    | -0.686458 | -0.005176 | -0.245376 |
| 19     | 6      | 0    | -2.131814 | 0.005722  | -0.117435 |
| 20     | 7      | 0    | -2.787062 | -1.074691 | 0.164263  |
| 21     | 6      | 0    | -4.190408 | -1.070213 | 0.239999  |
| 22     | 6      | 0    | -4.799521 | -1.946542 | 1.151184  |
| 23     | 6      | 0    | -4.998582 | -0.251366 | -0.571014 |
| 24     | 6      | 0    | -6.387333 | -0.282411 | -0.432414 |
| 25     | 6      | 0    | -6.985610 | -1.134353 | 0.500381  |
| 26     | 6      | 0    | -6.186052 | -1.969286 | 1.285684  |
| 27     | 1      | 0    | 8.223213  | 3.237939  | -0.665263 |
| 28     | 1      | 0    | 8.223967  | -0.797921 | -2.153778 |
| 29     | 1      | 0    | 9.465406  | 1.264875  | -1.534935 |
| 30     | 1      | 0    | 4.062420  | -0.912678 | -0.458188 |
| 31     | 1      | 0    | -3.380543 | 3.273789  | -0.793510 |
| 32     | 1      | 0    | -4.168582 | -2.587037 | 1.758804  |
| 33     | 1      | 0    | -4.542112 | 0.391413  | -1.316060 |
| 34     | 1      | 0    | -6.999997 | 0.355343  | -1.061661 |
| 35     | 1      | 0    | -8.065500 | -1.156515 | 0.603453  |
| 36     | 1      | 0    | -6.643973 | -2.640837 | 2.005069  |
| 37     | 1      | 0    | 5.749603  | 3.130698  | -0.406645 |
| 38     | 1      | 0    | 5.768725  | -0.897625 | -1.903762 |
| 39     | 1      | 0    | -0.616121 | 2.096814  | -0.705938 |
| 40     | 1      | 0    | 2.019572  | -2.063284 | -0.041932 |
| 41     | 8      | 0    | -2.512374 | 3.266804  | -1.238789 |
| 42     | 1      | 0    | -2.682132 | 2.814628  | -2.074974 |

|    |   |   |           |           |           |
|----|---|---|-----------|-----------|-----------|
| 43 | 1 | 0 | -2.626610 | 0.971809  | -0.250953 |
| 44 | 8 | 0 | -0.533330 | -2.374987 | 0.251827  |
| 45 | 1 | 0 | -1.513817 | -2.186462 | 0.303147  |
| 46 | 8 | 0 | 1.952283  | 2.415413  | -0.995825 |
| 47 | 1 | 0 | 2.933741  | 2.231428  | -1.037063 |

-----  
 TS3(singlet state with  $\langle S^* \rangle = 0.000$ )

Input orientation:

| Center<br>Number | Atomic<br>Number | Atomic<br>Type | Coordinates (Angstroms) |           |           |
|------------------|------------------|----------------|-------------------------|-----------|-----------|
|                  |                  |                | X                       | Y         | Z         |
| 1                | 8                | 0              | -2.666071               | 1.202781  | 1.176128  |
| 2                | 1                | 0              | -3.636071               | 1.269370  | 1.235052  |
| 3                | 8                | 0              | -2.662496               | 3.103318  | 1.341311  |
| 4                | 1                | 0              | -1.691651               | 3.119602  | 1.301328  |
| 5                | 6                | 0              | 7.458332                | 2.382388  | -1.372769 |
| 6                | 6                | 0              | 6.069927                | 2.342391  | -1.268922 |
| 7                | 6                | 0              | 5.404165                | 1.112987  | -1.145269 |
| 8                | 6                | 0              | 6.148423                | -0.078887 | -1.169894 |
| 9                | 6                | 0              | 7.536625                | -0.031036 | -1.283932 |
| 10               | 6                | 0              | 8.197781                | 1.196357  | -1.378503 |
| 11               | 7                | 0              | 4.000957                | 1.143107  | -1.041699 |
| 12               | 6                | 0              | 3.355099                | 0.238061  | -0.382196 |
| 13               | 6                | 0              | 1.905811                | 0.239976  | -0.317217 |
| 14               | 6                | 0              | 1.145718                | 1.241858  | -0.980152 |
| 15               | 6                | 0              | -0.246328               | 1.195910  | -0.888889 |
| 16               | 6                | 0              | 1.246325                | -0.764248 | 0.411489  |
| 17               | 6                | 0              | -0.142000               | -0.804342 | 0.507080  |
| 18               | 6                | 0              | -0.892309               | 0.190843  | -0.164050 |
| 19               | 6                | 0              | -2.377698               | 0.261876  | -0.083080 |
| 20               | 7                | 0              | -3.033685               | -0.845985 | 0.408659  |
| 21               | 6                | 0              | -4.370200               | -1.020351 | 0.144155  |
| 22               | 6                | 0              | -4.953119               | -2.217168 | 0.631939  |
| 23               | 6                | 0              | -5.188892               | -0.097332 | -0.564190 |
| 24               | 6                | 0              | -6.526276               | -0.393863 | -0.785499 |
| 25               | 6                | 0              | -7.080739               | -1.594559 | -0.322065 |
| 26               | 6                | 0              | -6.287408               | -2.504378 | 0.387338  |
| 27               | 1                | 0              | 7.963460                | 3.339720  | -1.456170 |
| 28               | 1                | 0              | 8.102839                | -0.957068 | -1.310223 |
| 29               | 1                | 0              | 9.278805                | 1.227405  | -1.470248 |
| 30               | 1                | 0              | 3.875220                | -0.555260 | 0.165049  |
| 31               | 1                | 0              | -3.153019               | 3.103914  | -0.356259 |
| 32               | 1                | 0              | -4.321407               | -2.904164 | 1.184892  |



|    |   |   |           |           |           |
|----|---|---|-----------|-----------|-----------|
| 33 | 1 | 0 | -4.787655 | 0.850003  | -0.913576 |
| 34 | 1 | 0 | -7.148540 | 0.315908  | -1.321000 |
| 35 | 1 | 0 | -8.127542 | -1.813671 | -0.505069 |
| 36 | 1 | 0 | -6.716960 | -3.431211 | 0.753023  |
| 37 | 1 | 0 | 5.482870  | 3.255264  | -1.267012 |
| 38 | 1 | 0 | 5.640209  | -1.036875 | -1.131803 |
| 39 | 1 | 0 | -0.835552 | 1.958291  | -1.389617 |
| 40 | 1 | 0 | 1.825930  | -1.529908 | 0.917957  |
| 41 | 8 | 0 | -3.402255 | 2.899483  | -1.289415 |
| 42 | 1 | 0 | -4.186209 | 3.435182  | -1.462740 |
| 43 | 1 | 0 | -2.813459 | 0.802872  | -0.922327 |
| 44 | 8 | 0 | -0.717907 | -1.796110 | 1.231767  |
| 45 | 1 | 0 | -1.699456 | -1.692827 | 1.125202  |
| 46 | 8 | 0 | 1.728848  | 2.229979  | -1.689493 |
| 47 | 1 | 0 | 2.715922  | 2.079238  | -1.620085 |

---

## 7. REFERENCE

1. Waller, P. J.; Lyle, S. J.; Osborn Popp, T. M.; Diercks, C. S.; Reimer, J. A.; Yaghi, O. M., Chemical Conversion of Linkages in Covalent Organic Frameworks. *Journal of the American Chemical Society* **2016**, *138* (48), 15519-15522.
2. Kandambeth, S.; Shinde, D. B.; Panda, M. K.; Lukose, B.; Heine, T.; Banerjee, R., Enhancement of Chemical Stability and Crystallinity in Porphyrin-Containing Covalent Organic Frameworks by Intramolecular Hydrogen Bonds. *Angewandte Chemie International Edition* **2013**, *52* (49), 13052-13056.
3. Russat, J., Characterization of polyamic acid/polyimide films in the nanometric thickness range from spin-deposited polyamic acid. *Surface and Interface Analysis* **1988**, *11* (8), 414-420.
4. Pang, Z.-F.; Zhou, T.-Y.; Liang, R.-R.; Qi, Q.-Y.; Zhao, X., Regulating the topology of 2D covalent organic frameworks by the rational introduction of substituents. *Chemical Science* **2017**, *8* (5), 3866-3870.
5. Blokhuis, A.; Lacoste, D.; Nghe, P., Universal motifs and the diversity of autocatalytic systems. *Proceedings of the National Academy of Sciences* **2020**, *117* (41), 25230-25236.
6. Wang, X.; Xie, H.; Knapp, J. G.; Wasson, M. C.; Wu, Y.; Ma, K.; Stone, A. E. B. S.; Krzyaniak, M. D.; Chen, Y.; Zhang, X.; Notestein, J. M.; Wasielewski, M. R.; Farha, O. K., Mechanistic Investigation of Enhanced Catalytic Selectivity toward Alcohol Oxidation with Ce Oxysulfate Clusters. *Journal of the American Chemical Society* **2022**, *144* (27), 12092-12101.
7. Giannakoudakis, D. A.; Qayyum, A.; Barczak, M.; Colmenares-Quintero, R. F.; Borowski, P.; Triantafyllidis, K.; Colmenares, J. C., Mechanistic and kinetic studies of benzyl alcohol photocatalytic oxidation by nanostructured titanium (hydro)oxides: Do we know the entire story? *Applied Catalysis B: Environmental* **2023**, *320*, 121939.
8. Shiraishi, Y.; Kanazawa, S.; Sugano, Y.; Tsukamoto, D.; Sakamoto, H.; Ichikawa, S.; Hirai, T., Highly Selective Production of Hydrogen Peroxide on Graphitic Carbon Nitride (g-C<sub>3</sub>N<sub>4</sub>) Photocatalyst Activated by Visible Light. *ACS Catalysis* **2014**, *4* (3), 774-780.
9. Kofuji, Y.; Isobe, Y.; Shiraishi, Y.; Sakamoto, H.; Tanaka, S.; Ichikawa, S.; Hirai, T., Carbon Nitride–Aromatic Diimide–Graphene Nanohybrids: Metal-Free Photocatalysts for Solar-to-Hydrogen Peroxide Energy Conversion with 0.2% Efficiency. *Journal of the American Chemical Society* **2016**, *138* (31), 10019-10025.
10. Kim, H.-i.; Choi, Y.; Hu, S.; Choi, W.; Kim, J.-H., Photocatalytic hydrogen peroxide production by anthraquinone-augmented polymeric carbon nitride. *Applied Catalysis B: Environmental* **2018**, *229*, 121-129.
11. Teng, Z.; Zhang, Q.; Yang, H.; Kato, K.; Yang, W.; Lu, Y.-R.; Liu, S.; Wang, C.; Yamakata, A.; Su, C.; Liu, B.; Ohno, T., Atomically dispersed antimony on carbon nitride for the artificial photosynthesis of hydrogen peroxide. *Nature Catalysis* **2021**, *4* (5), 374-384.
12. Zhang, P.; Tong, Y.; Liu, Y.; Vequizo, J. J. M.; Sun, H.; Yang, C.; Yamakata, A.; Fan, F.; Lin, W.; Wang, X.; Choi, W., Heteroatom Dopants Promote Two-Electron O<sub>2</sub> Reduction for Photocatalytic Production of H<sub>2</sub>O<sub>2</sub> on Polymeric Carbon Nitride. *Angewandte Chemie International Edition* **2020**, *59* (37), 16209-16217.
13. Shiraishi, Y.; Takii, T.; Hagi, T.; Mori, S.; Kofuji, Y.; Kitagawa, Y.; Tanaka, S.; Ichikawa, S.; Hirai, T., Resorcinol–formaldehyde resins as metal-free semiconductor photocatalysts for solar-to-hydrogen peroxide energy conversion. *Nature Materials* **2019**, *18* (9), 985-993.
14. Isaka, Y.; Kondo, Y.; Kawase, Y.; Kuwahara, Y.; Mori, K.; Yamashita, H., Photocatalytic

production of hydrogen peroxide through selective two-electron reduction of dioxygen utilizing amine-functionalized MIL-125 deposited with nickel oxide nanoparticles. *Chemical Communications* **2018**, *54* (67), 9270-9273.

15. Isaka, Y.; Kawase, Y.; Kuwahara, Y.; Mori, K.; Yamashita, H., Two-Phase System Utilizing Hydrophobic Metal-Organic Frameworks (MOFs) for Photocatalytic Synthesis of Hydrogen Peroxide. *Angewandte Chemie International Edition* **2019**, *58* (16), 5402-5406.

16. Shiraishi, Y.; Kanazawa, S.; Tsukamoto, D.; Shiro, A.; Sugano, Y.; Hirai, T., Selective Hydrogen Peroxide Formation by Titanium Dioxide Photocatalysis with Benzylic Alcohols and Molecular Oxygen in Water. *ACS Catalysis* **2013**, *3* (10), 2222-2227.

17. Kou, M.; Wang, Y.; Xu, Y.; Ye, L.; Huang, Y.; Jia, B.; Li, H.; Ren, J.; Deng, Y.; Chen, J.; Zhou, Y.; Lei, K.; Wang, L.; Liu, W.; Huang, H.; Ma, T., Molecularly Engineered Covalent Organic Frameworks for Hydrogen Peroxide Photosynthesis. *Angewandte Chemie International Edition* **2022**, *61* (19), e202200413.

18. Li, L.; Xu, L.; Hu, Z.; Yu, J. C., Enhanced Mass Transfer of Oxygen through a Gas-Liquid-Solid Interface for Photocatalytic Hydrogen Peroxide Production. *Advanced Functional Materials* **2021**, *31* (52), 2106120.

19. Moon, B. C.; Bayarkhuu, B.; Zhang, K. A. I.; Lee, D. K.; Byun, J., Solar-driven H<sub>2</sub>O<sub>2</sub> production via cooperative auto- and photocatalytic oxidation in fine-tuned reaction media. *Energy & Environmental Science* **2022**, *15* (12), 5082-5092.
